# Supplementary material for: Unique nanocages of 12CaO·7Al2O3boost heterolytic hydrogen activation and selective hydrogenation of heteroarenes over ruthenium catalyst
Source: Royal Society of Chemistry journal article supplement (doi:10.1039/c6gc02782b), 2016-11-28

**Unique nanocages of  $12\text{CaO}\cdot 7\text{Al}_2\text{O}_3$  boost heterolytic hydrogen activation and selective hydrogenation of heteroarenes over ruthenium catalyst**

*Tian-Nan Ye, Jiang Li, Masaaki Kitano, \* Hideo Hosono\**

Materials Research Center for Element Strategy, Tokyo Institute of Technology, 4259  
Nagatsuta, Midori-ku, Yokohama 226-8503, Japan

Frontier Research Center, Tokyo Institute of Technology, 4259 Nagatsuta, Midori-ku,  
Yokohama 226-8503, Japan

ACCEL, Japan Science and Technology Agency, 4-1-8 Honcho, Kawaguchi, Saitama, 332-  
0012, Japan

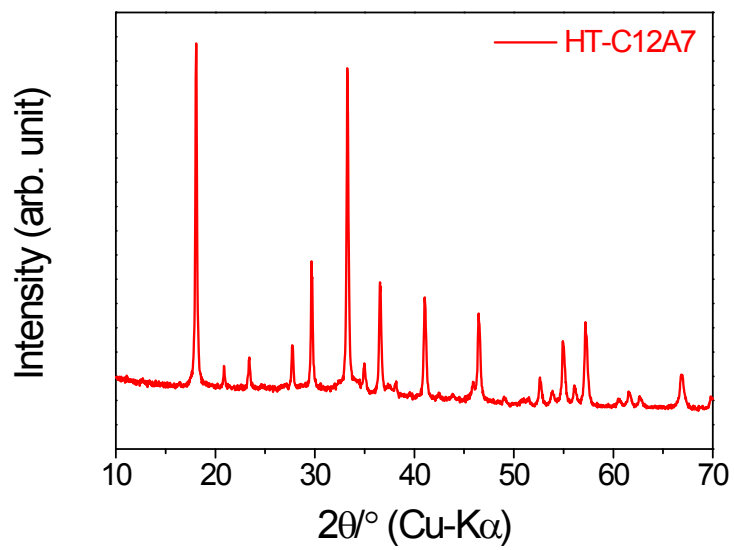

**Fig. S1** XRD pattern of HT-C12A7.

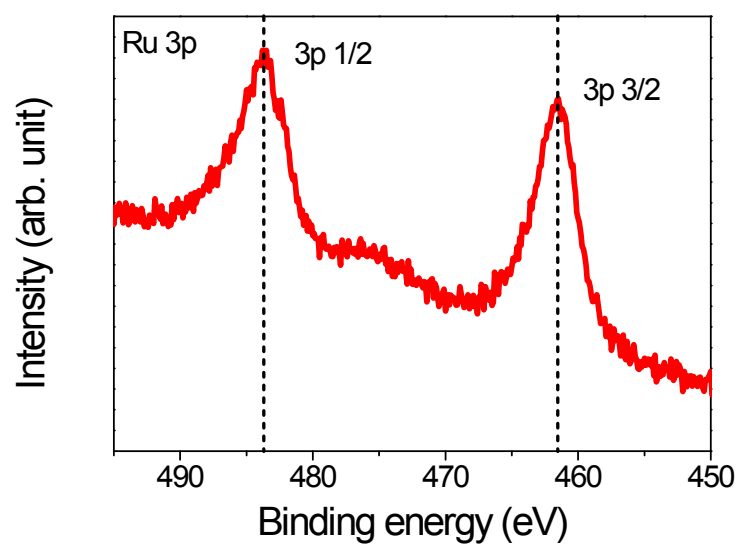

**Fig. S2** XPS Ru 3p spectrum for Ru/HT-C12A7. The dotted lines indicate the Ru 3p peaks derived from bulk Ru metal respectively.

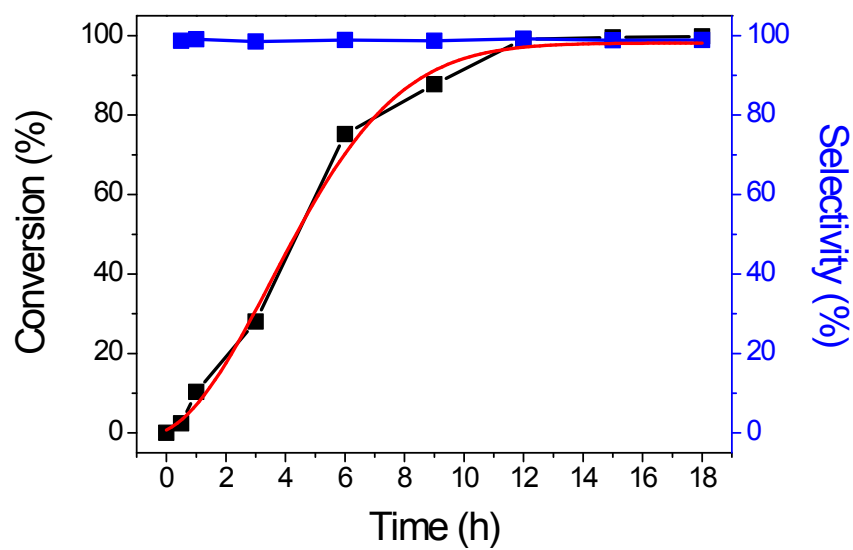

**Fig. S3** Kinetic data of the hydrogenation of quinoline with 2wt% Ru/HT-C12A7 catalyst. Reaction condition: 5 mmol substrate, catalyst 40 mg, H<sub>2</sub> (1.0 MPa), 80 °C. Yield was determined by gas GC and GCMS analysis.

Table S1. Summary of reported Ru, Pt and other transition metal based heterogeneous catalysts for hydrogenation of various quinolines.

| Catalyst                             | Solvent | B.E.T.<br>[m <sup>2</sup> g <sup>-1</sup> ] | H <sub>2</sub><br>[MPa] | Temp.<br>[°C] | Time<br>[h] | Yield<br>[%] | Ref.                                                |
|--------------------------------------|---------|---------------------------------------------|-------------------------|---------------|-------------|--------------|-----------------------------------------------------|
| <b>Ru/HT-C12A7</b>                   | ---     | <b>54</b>                                   | <b>1.0</b>              | <b>80</b>     | <b>12</b>   | <b>98.3</b>  | <b>This work</b>                                    |
| <b>Ru/HT-C12A7<sup>a</sup></b>       | ---     | <b>54</b>                                   | <b>1.0</b>              | <b>60</b>     | <b>12</b>   | <b>95.4</b>  | <b>This work</b>                                    |
| Au/HAS-TiO <sub>2</sub> <sup>a</sup> | toluene | 124                                         | 2.0                     | 25            | 16          | 92           | <i>J. Am. Chem. Soc.</i> 2012, 134, 17592.          |
| Ru/HAS-TiO <sub>2</sub> <sup>a</sup> | toluene | 124                                         | 2.0                     | 60            | 3           | 81.8         | <i>J. Am. Chem. Soc.</i> 2012, 134, 17592.          |
| Au/HAS-TiO <sub>2</sub>              | ---     | 124                                         | 2.0                     | 140           | 48          | 100          | <i>J. Am. Chem. Soc.</i> 2012, 134, 17592.          |
| Rh/Al <sub>2</sub> O <sub>3</sub>    | ---     | ---                                         | 3.0                     | 80            | 115         | 72.9         | <i>ACS Catal.</i> 2012, 2, 1524.                    |
| Rh/MgO                               | ---     | ---                                         | 2.0                     | 100           | 24          | 100          | <i>Applied Catalysis A: General</i> 2014, 477, 117. |
| RhNP/Lewic<br>acidic IL              | ---     | ---                                         | 3.0                     | 80            | 15-<br>48   | 95           | <i>Angew. Chem. Int. Ed.</i> 2016, 55, 292.         |

<sup>a</sup> 6-chloroquinoline was used as a substrate instead of quinoline.

Table S2. Characterization of Ru catalysts on various supports.

| Catalyst                                            | Surface area<br>(m <sup>2</sup> g <sup>-1</sup> ) | Ru loading<br>(wt%) | Dispersion<br>(%) <sup>a</sup> | Particle size<br>[nm] <sup>a</sup> |
|-----------------------------------------------------|---------------------------------------------------|---------------------|--------------------------------|------------------------------------|
| <b>Ru/HT-C12A7</b>                                  | <b>54</b>                                         | <b>2.0</b>          | <b>37.3</b>                    | <b>3.6</b>                         |
| <b>Ru/HT-C12A7</b>                                  | <b>54</b>                                         | <b>5.0</b>          | <b>32.5</b>                    | <b>4.1</b>                         |
| Ru/Al <sub>2</sub> O <sub>3</sub>                   | 85                                                | 5.0                 | 19.6                           | 6.8                                |
| Ru/CaO                                              | 77                                                | 5.0                 | 26.3                           | 5.0                                |
| Ru/SiO <sub>2</sub> -Al <sub>2</sub> O <sub>3</sub> | 420                                               | 5.0                 | 37.1                           | 3.6                                |
| Ru/MgO                                              | 34                                                | 5.0                 | 22.7                           | 5.8                                |
| Ru/ZrO <sub>2</sub>                                 | 9.2                                               | 5.0                 | 13.3                           | 10.0                               |
| Ru/TiO <sub>2</sub>                                 | 112                                               | 5.0                 | 19.0                           | 7.0                                |

<sup>a</sup> Dispersion and particle size were calculated on the basis of CO chemisorption values, assuming spherical metal particles and that the stoichiometry of Ru/CO = 1.

Table S3. Main side products of the substrates with low selectivities.

| Entry          | Substrate                                                                         | product                                                                           | Yield (%) <sup>c</sup> | Side product                                                                        | Yield (%) <sup>c</sup> |
|----------------|-----------------------------------------------------------------------------------|-----------------------------------------------------------------------------------|------------------------|-------------------------------------------------------------------------------------|------------------------|
| 1 <sup>a</sup> | 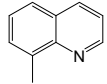 |  | 89.1                   |  | 10.9                   |
| 2 <sup>b</sup> |  |  | 91.4                   |  | 8.6                    |
| 3 <sup>b</sup> |  |  | 87.7                   |  | 12.3                   |
| 4 <sup>a</sup> |  |  | 87.4                   |   | 12.6                   |

<sup>a</sup> Reaction condition: 5 mmol substrate, 40 mg catalyst (2 wt% Ru/HT-C12A7), 1.0 MPa H<sub>2</sub>, 15 h, 80 °C; <sup>b</sup> 12 h; <sup>c</sup> isolated yield.

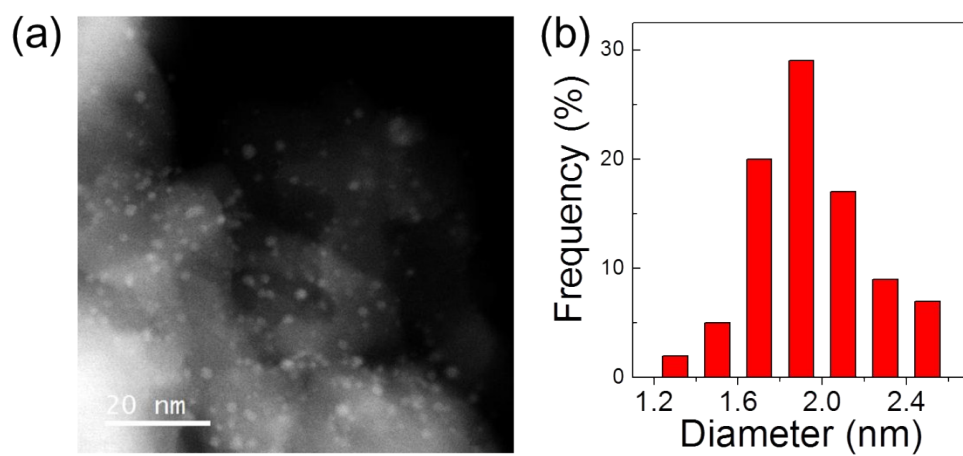

**Fig. S4** HAADF STEM image of Ru/HT-C12A7 after the reaction of chemoselective hydrogenation of quinoline. (a) Overview image of Ru/HT-C12A7 and (b) metal particle size distribution histogram.



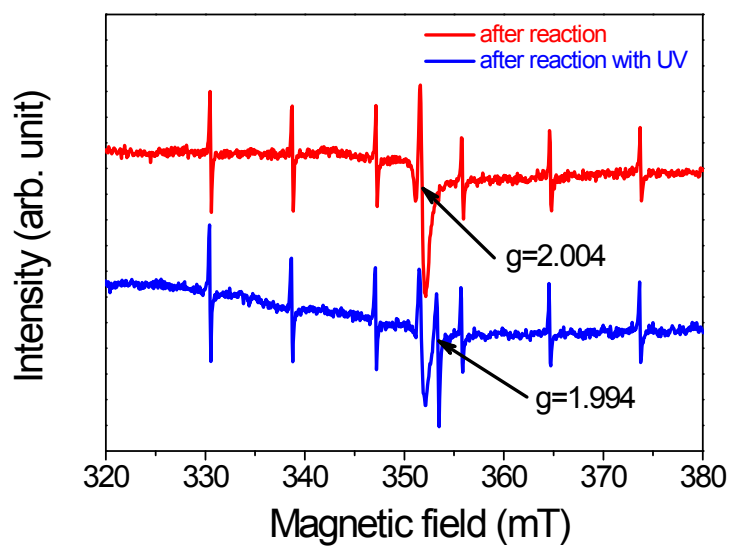

**Fig. S5** EPR spectra of Ru/HT-C12A7 catalyst after hydrogenation reaction and that after reaction then irradiated by UV light (microwave frequency = 9.7 GHz, temperature = 25 °C). The sextet with a separation of  $\sim 8$  mT is due to  $\text{Mn}^{2+}$  in MgO as a standard.

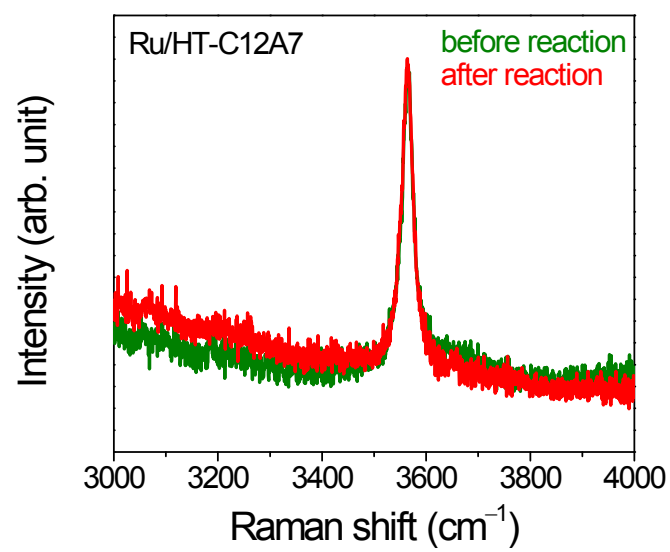

**Fig. S6** Raman spectra of Ru/HT-C12A7 catalyst before and after hydrogenation reaction.

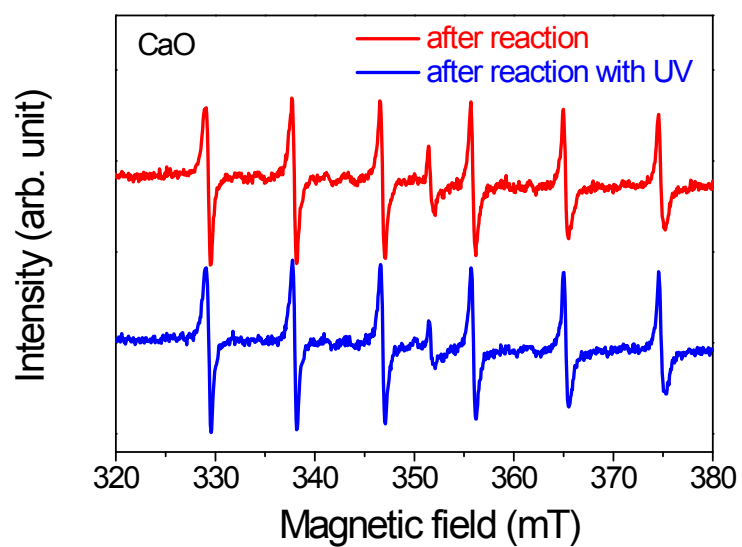

**Fig. S7** EPR spectra of Ru/CaO catalyst after the hydrogenation reaction and the catalyst after reaction and then irradiated by UV light (microwave frequency = 9.7 GHz, temperature = 25 °C). The sextet with a separation of ~8mT is due to Mn<sup>2+</sup> in MgO as a standard.

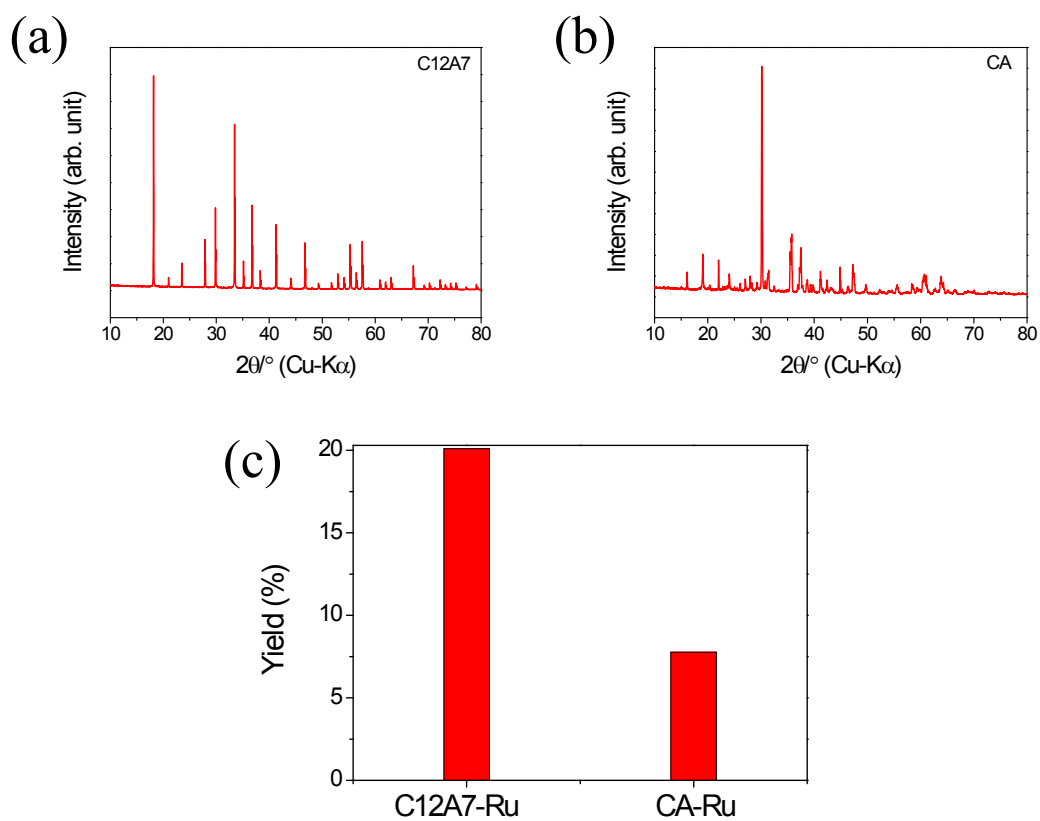

**Fig. S8** XRD patterns of solid-state reaction prepared (a) C12A7 and (b) CaO·Al<sub>2</sub>O<sub>3</sub> (CA). Catalytic activities (c) of quinoline hydrogenation by C12A7 and CA loaded with 10wt% Ru, respectively. Reaction condition: 5 mmol substrate, catalyst 40 mg, H<sub>2</sub> (1.0 MPa), 80 °C, 12h.

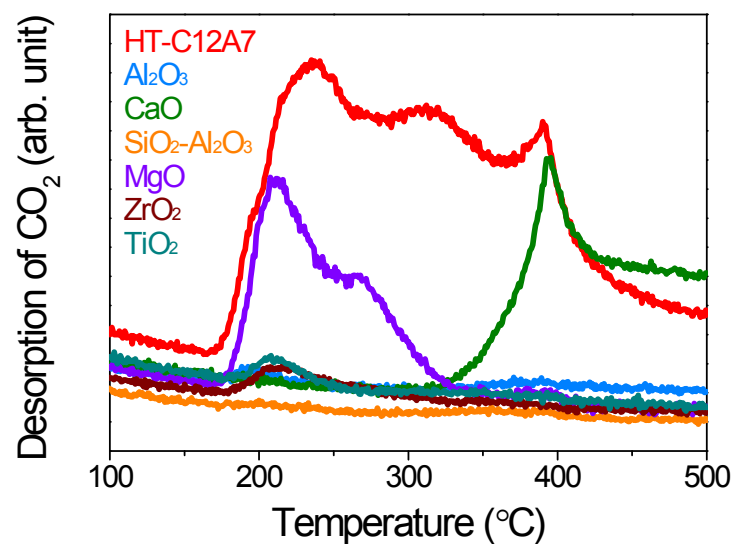

**Fig. S9** CO<sub>2</sub>-TPD profiles of various Ru-based catalysts with different supports.

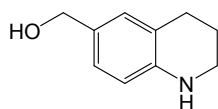

$^1\text{H}$  NMR ( $\text{CDCl}_3$ , 300 MHz):  $\delta$  = 6.96 (s, 2H), 6.52-6.39 (m, 1H), 4.50 (s, 2H), 3.86 (brs, 1H), 3.36-3.22 (m, 2H), 2.76 (t, 2H), 2.02-1.85 (m, 2H);  $^{13}\text{C}$  NMR ( $\text{CDCl}_3$ , 75 MHz):  $\delta$  = 144.5, 136.1, 129.1, 126.3, 121.4, 114.1, 65.5, 41.9, 26.9, 22.0.

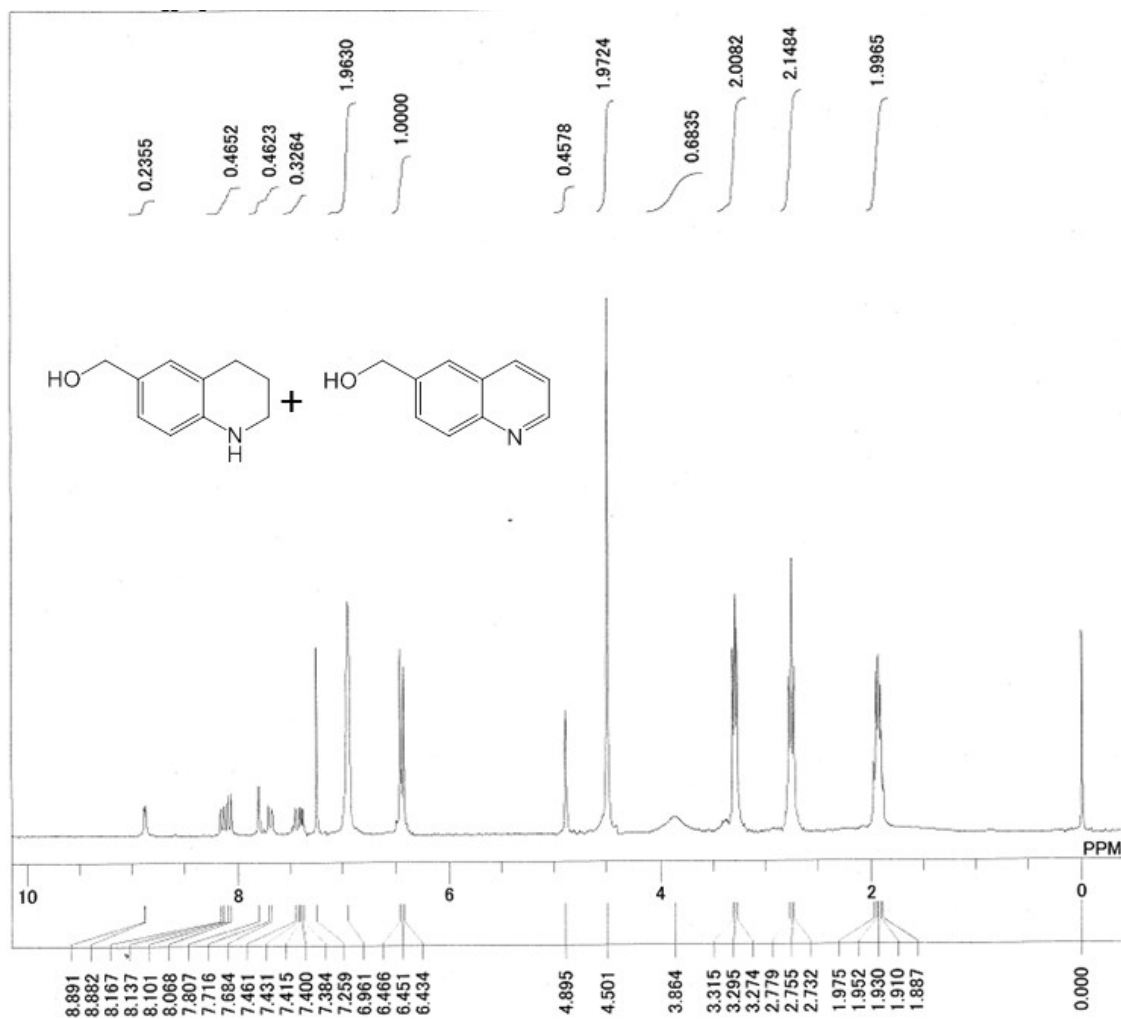

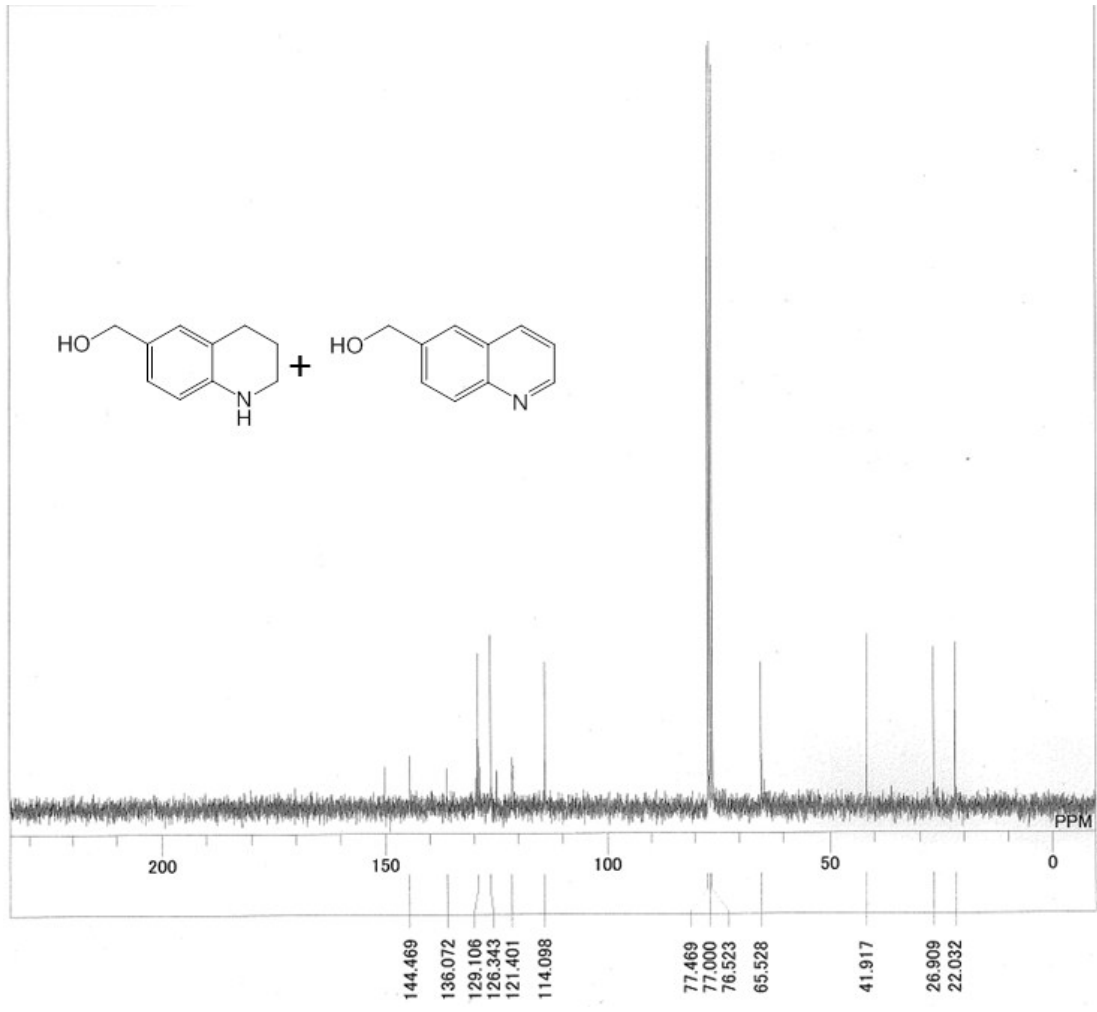

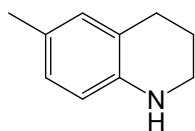

$^1\text{H}$  NMR ( $\text{CDCl}_3$ , 300 MHz):  $\delta$  = 6.78 (s, 2H), 6.52-6.41 (m, 1H), 3.65-2.89 (m, 3H), 2.73 (t, 2H), 2.20 (s, 3H), 2.08-1.81 (m, 2H);  $^{13}\text{C}$  NMR ( $\text{CDCl}_3$ , 75 MHz):  $\delta$  = 142.2, 130.0, 127.2, 126.3, 121.7, 114.5, 42.1, 26.9, 22.4, 20.4.

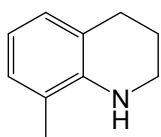

$^1\text{H}$  NMR ( $\text{CDCl}_3$ , 300 MHz):  $\delta$  = 6.85 (t, 2H), 6.54 (t, 1H), 3.62 (s, 1H), 3.39-3.28 (m, 2H), 2.77 (t, 2H), 2.06 (s, 3H), 2.05-1.85 (m, 2H);  $^{13}\text{C}$  NMR ( $\text{CDCl}_3$ , 75 MHz):  $\delta$  = 142.6, 127.7, 127.3, 121.1, 120.7, 116.3, 42.2, 27.2, 22.1, 17.1.

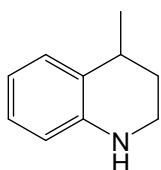

$^1\text{H}$  NMR ( $\text{CDCl}_3$ , 300 MHz):  $\delta$  = 7.04 (d, 1H), 6.95 (t, 1H), 6.62 (t, 1H), 6.45 (d, 1H), 3.83 (s, 1H), 3.41-3.11 (m, 2H), 2.99-2.78 (m, 1H), 2.08-1.82 (m, 1H), 1.76-1.53 (m, 1H), 1.28 (d, 3H);  $^{13}\text{C}$  NMR ( $\text{CDCl}_3$ , 75 MHz):  $\delta$  = 144.2, 128.3, 126.6, 116.8, 114.0, 38.9, 30.1, 29.7, 22.6.

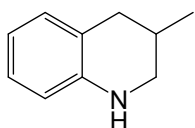

$^1\text{H}$  NMR ( $\text{CDCl}_3$ , 300 MHz):  $\delta$  = 7.05-6.83 (m, 2H), 6.58 (t, 1H), 6.43 (d, 1H), 3.78 (s, 1H), 3.30-3.10 (m, 1H), 2.91-2.62 (m, 2H), 2.45-2.30 (m, 1H), 2.15-1.95 (m, 1H), 1.01 (d, 3H);  $^{13}\text{C}$  NMR ( $\text{CDCl}_3$ , 75 MHz):  $\delta$  = 144.2, 129.4, 126.5, 120.9, 116.7, 113.7, 48.7, 35.3, 27.0, 18.9.

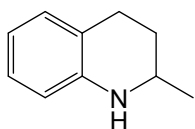

$^1\text{H}$  NMR ( $\text{CDCl}_3$ , 300 MHz):  $\delta$  = 7.02-6.88 (m, 2H), 6.60 (t, 1H), 6.46 (d, 1H), 3.65 (brs, 1H), 3.48-3.25 (m, 1H), 2.93-2.55 (m, 2H), 2.01-1.76 (m, 1H), 1.70-1.45 (m, 1H), 1.19 (d, 3H);  $^{13}\text{C}$



NMR (CDCl<sub>3</sub>, 75 MHz):  $\delta$  = 144.7, 129.2, 126.6, 121.1, 116.9, 114.0, 47.1, 30.1, 26.6, 22.6.

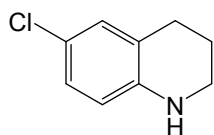

<sup>1</sup>H NMR (CDCl<sub>3</sub>, 300 MHz):  $\delta$  = 7.02-6.91 (m, 2H), 6.43-6.35 (m, 1H), 3.65 (s, 1H), 3.35-3.15 (m, 2H), 2.70 (t, 2H), 2.04-1.77 (m, 2H); <sup>13</sup>C NMR (CDCl<sub>3</sub>, 75 MHz):  $\delta$  = 143.1, 128.9, 126.4, 122.8, 121.1, 115.1, 41.7, 26.7, 21.6.

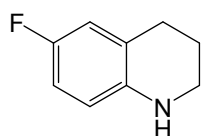

<sup>1</sup>H NMR (CDCl<sub>3</sub>, 300 MHz):  $\delta$  = 6.78-6.55 (m, 2H), 6.51-6.22 (m, 1H), 3.51 (s, 1H), 3.28 (t, 2H), 2.75 (t, 2H), 2.08-1.61 (m, 2H); <sup>13</sup>C NMR (CDCl<sub>3</sub>, 75 MHz):  $\delta$  = 157.1, 140.9, 122.7 (d), 115.5 (d), 114.8 (d), 113.1 (d), 42.0, 27.0, 21.9.

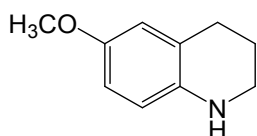

<sup>1</sup>H NMR (CDCl<sub>3</sub>, 300 MHz):  $\delta$  = 6.65-6.46 (m, 2H), 6.45-6.35 (m, 1H), 3.70 (s, 3H), 3.57 (brs, 1H), 3.20 (t, 2H), 2.72 (t, 2H), 1.98-1.80 (m, 2H); <sup>13</sup>C NMR (CDCl<sub>3</sub>, 75 MHz):  $\delta$  = 151.5, 138.7, 122.6, 115.3, 114.6, 112.7, 55.5, 55.3, 42.1, 27.0, 22.2.

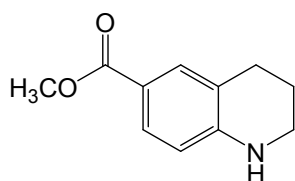

<sup>1</sup>H NMR (CDCl<sub>3</sub>, 300 MHz):  $\delta$  = 7.68-7.57 (m, 2H), 6.37 (d, 1H), 4.36 (s, 1H), 3.83 (s, 3H), 3.40-3.27 (m, 2H), 2.76 (t, 2H), 2.01-1.79 (m, 2H); <sup>13</sup>C NMR (CDCl<sub>3</sub>, 75 MHz):  $\delta$  = 167.5, 148.7, 131.2, 129.0, 119.8, 117.3, 112.6, 51.4, 41.6, 26.8, 21.3.

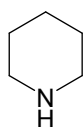

<sup>1</sup>H NMR (CDCl<sub>3</sub>, 300 MHz):  $\delta$  = 2.99-2.69 (m, 2H), 1.72-1.25 (m, 4H); <sup>13</sup>C NMR (CDCl<sub>3</sub>, 75

MHz):  $\delta = 47.3, 27.1, 25.0$ .

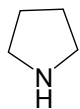

$^1\text{H NMR}$  ( $\text{CDCl}_3$ , 300 MHz):  $\delta = 3.01\text{-}2.62$  (m, 4H),  $1.88\text{-}1.43$  (m, 4H);  $^{13}\text{C NMR}$  ( $\text{CDCl}_3$ , 75 MHz):  $\delta = 46.9, 25.4$ .

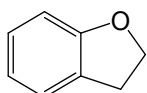

$^1\text{H NMR}$  ( $\text{CDCl}_3$ , 300 MHz):  $\delta = 7.31\text{-}6.98$  (m, 2H),  $6.95\text{-}6.83$  (m, 2H),  $4.55$  (t, 2H),  $3.20$  (t, 2H);  $^{13}\text{C NMR}$  ( $\text{CDCl}_3$ , 75 MHz):  $\delta = 159.9, 127.9, 126.8, 124.9, 120.3, 109.3, 71.0, 27.0$ .

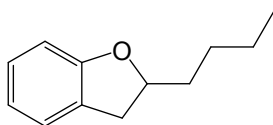

$^1\text{H NMR}$  ( $\text{CDCl}_3$ , 300 MHz):  $\delta = 7.19\text{-}7.01$  (m, 2H),  $6.88\text{-}6.65$  (m, 2H),  $4.84\text{-}6.63$  (m, 1H),  $3.35\text{-}3.16$  (m, 1H),  $2.91\text{-}2.72$  (m, 1H),  $1.91\text{-}1.73$  (m, 1H),  $1.71\text{-}1.56$  (m, 1H),  $1.55\text{-}1.18$  (m, 4H),  $0.93$  (t, 3H);  $^{13}\text{C NMR}$  ( $\text{CDCl}_3$ , 75 MHz):  $\delta = 159.5, 127.8, 126.9, 124.8, 120.0, 109.2, 83.3, 35.8, 35.4, 27.6, 22.6, 14.0$ .

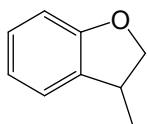

$^1\text{H NMR}$  ( $\text{CDCl}_3$ , 300 MHz):  $\delta = 7.19\text{-}7.03$  (m, 2H),  $6.91\text{-}6.58$  (m, 2H),  $4.65$  (t, 1H),  $4.05$  (t, 1H),  $3.61\text{-}3.38$  (m, 1H),  $1.30$  (d, 3H);  $^{13}\text{C NMR}$  ( $\text{CDCl}_3$ , 75 MHz):  $\delta = 159.7, 132.2, 128.0, 123.8, 120.4, 109.4, 78.4, 78.3, 36.5, 19.3$ .

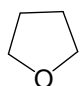

$^1\text{H NMR}$  ( $\text{CDCl}_3$ , 300 MHz):  $\delta = 3.91\text{-}3.58$  (m, 4H),  $2.03\text{-}1.71$  (m, 4H);  $^{13}\text{C NMR}$  ( $\text{CDCl}_3$ , 75 MHz):  $\delta = 67.9, 25.6$ .

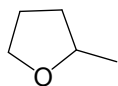

$^1\text{H}$  NMR ( $\text{CDCl}_3$ , 300 MHz):  $\delta = 4.05\text{-}3.80$  (m, 2H), 3.79-3.58 (m, 1H), 2.09-1.66 (m, 3H), 1.51-1.29 (m, 1H), 1.23 (d, 3H);  $^{13}\text{C}$  NMR ( $\text{CDCl}_3$ , 75 MHz):  $\delta = 75.2, 67.7, 33.0, 25.8, 20.9$ .

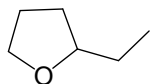

$^1\text{H}$  NMR ( $\text{CDCl}_3$ , 300 MHz):  $\delta = 3.85\text{-}3.49$  (m, 3H), 1.99-1.65 (m, 3H), 1.63-1.21 (m, 3H), 0.86 (t, 3H);  $^{13}\text{C}$  NMR ( $\text{CDCl}_3$ , 75 MHz):  $\delta = 80.6, 67.5, 30.7, 28.4, 25.6, 10.3$ .

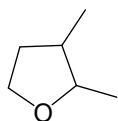

$^1\text{H}$  NMR ( $\text{CDCl}_3$ , 300 MHz):  $\delta = 4.01\text{-}3.75$  (m, 2H), 3.71-3.49 (m, 1H), 2.25-1.84 (m, 2H), 1.61-1.36 (m, 1H), 1.02 (d, 3H), 0.85 (d, 3H);  $^{13}\text{C}$  NMR ( $\text{CDCl}_3$ , 75 MHz):  $\delta = 77.1, 66.0, 35.8, 33.6, 15.8, 14.1$ .

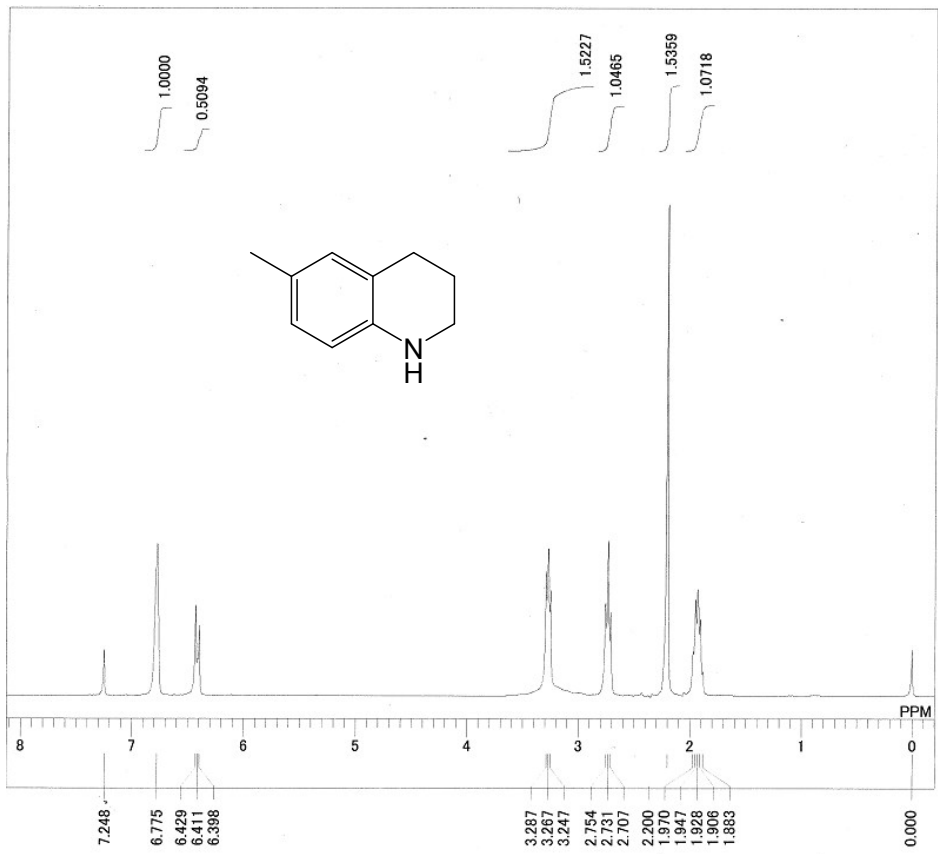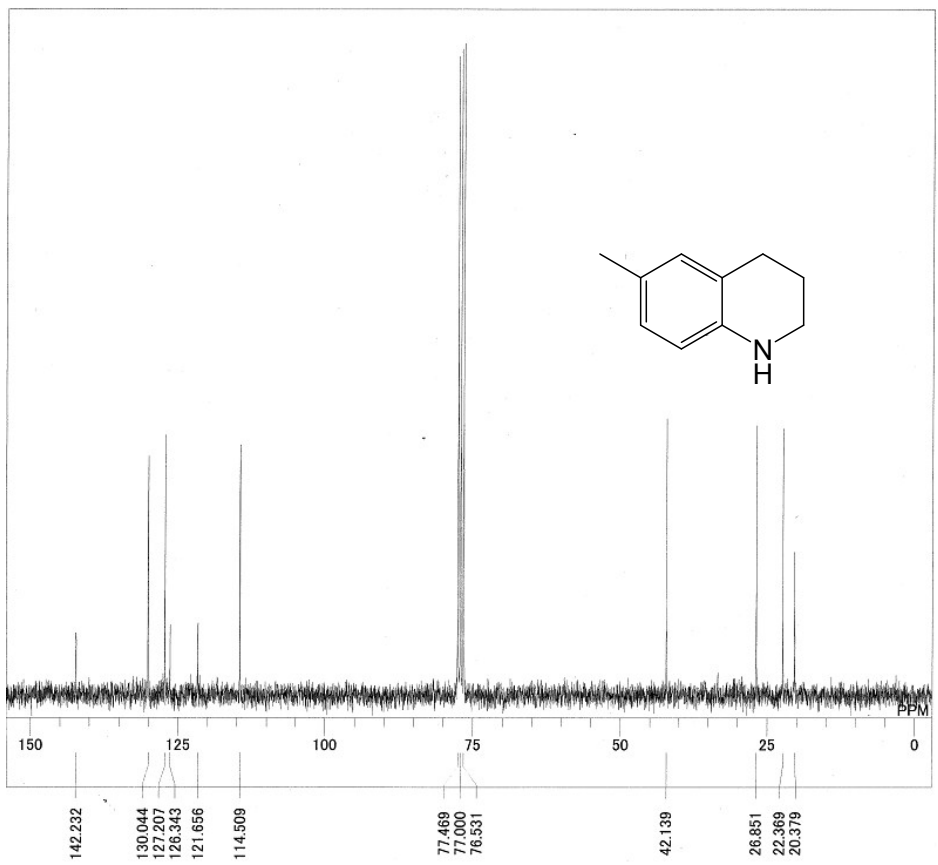

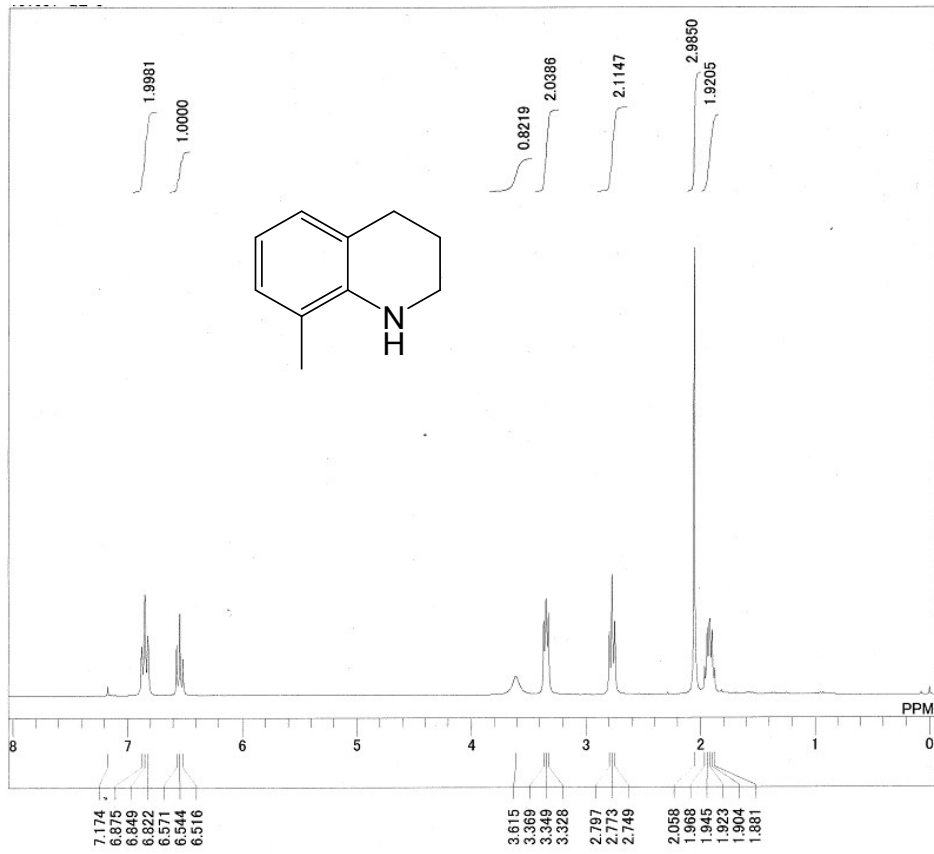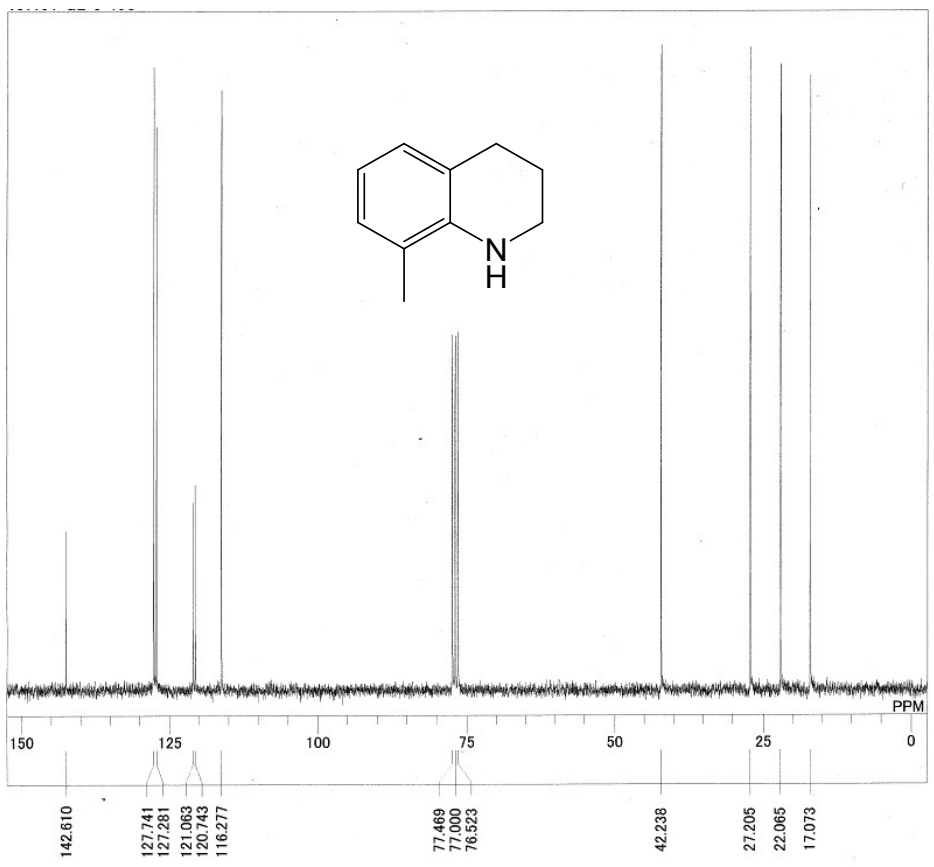

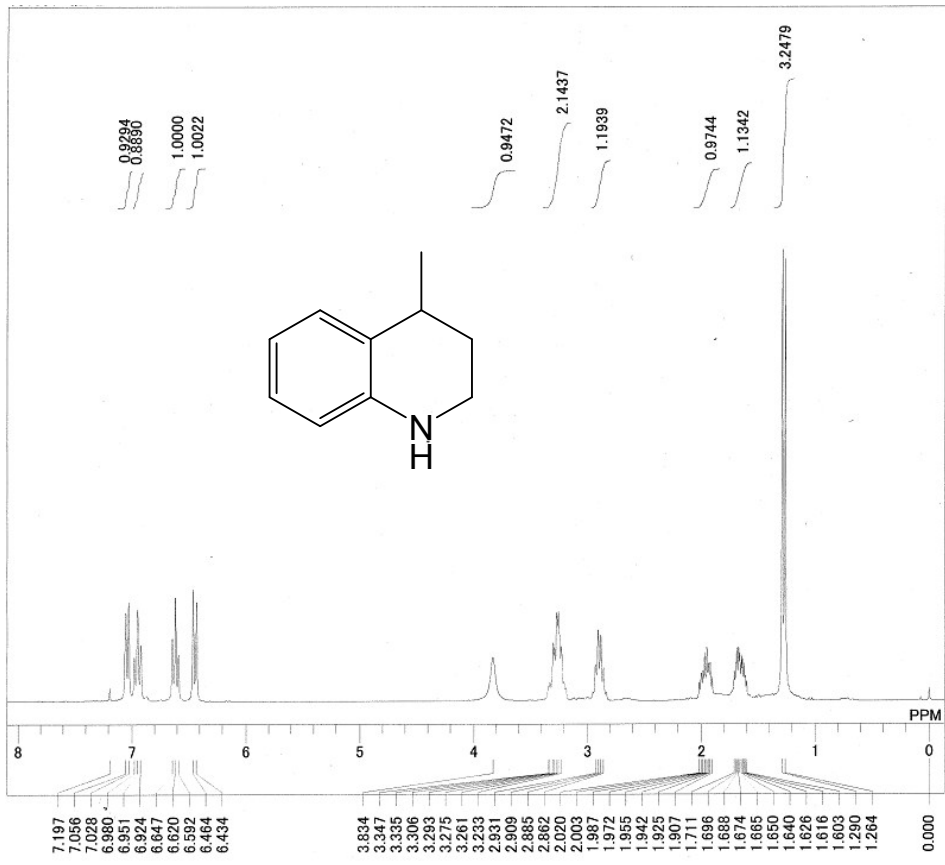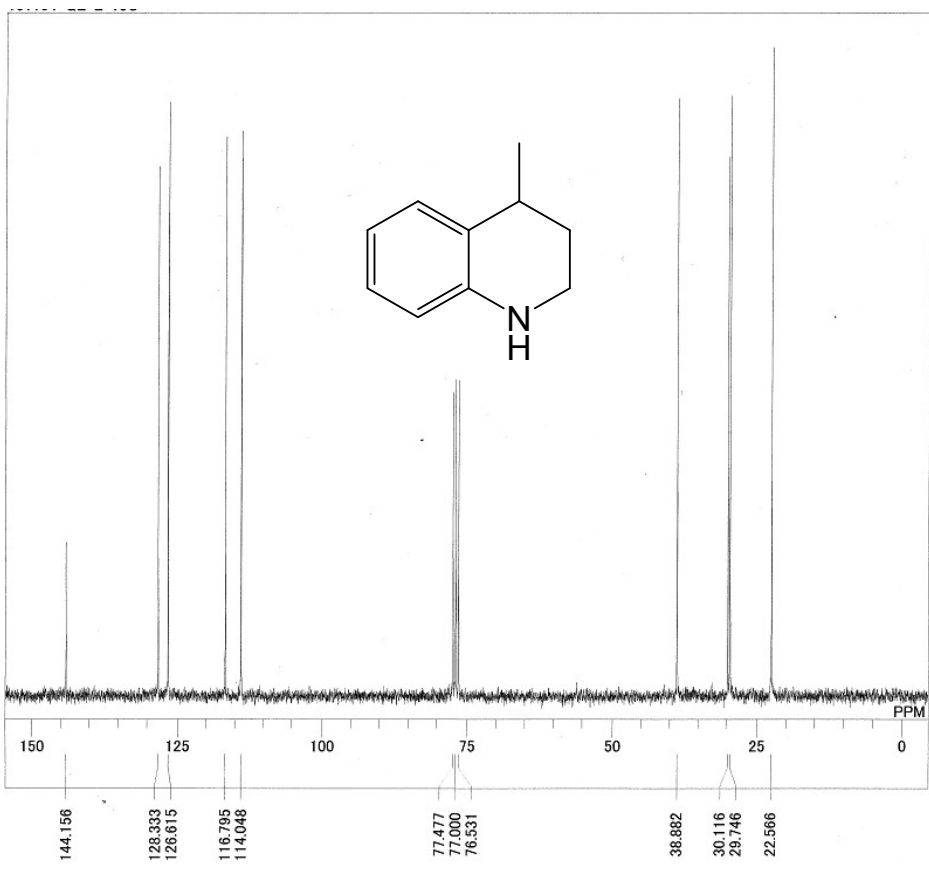

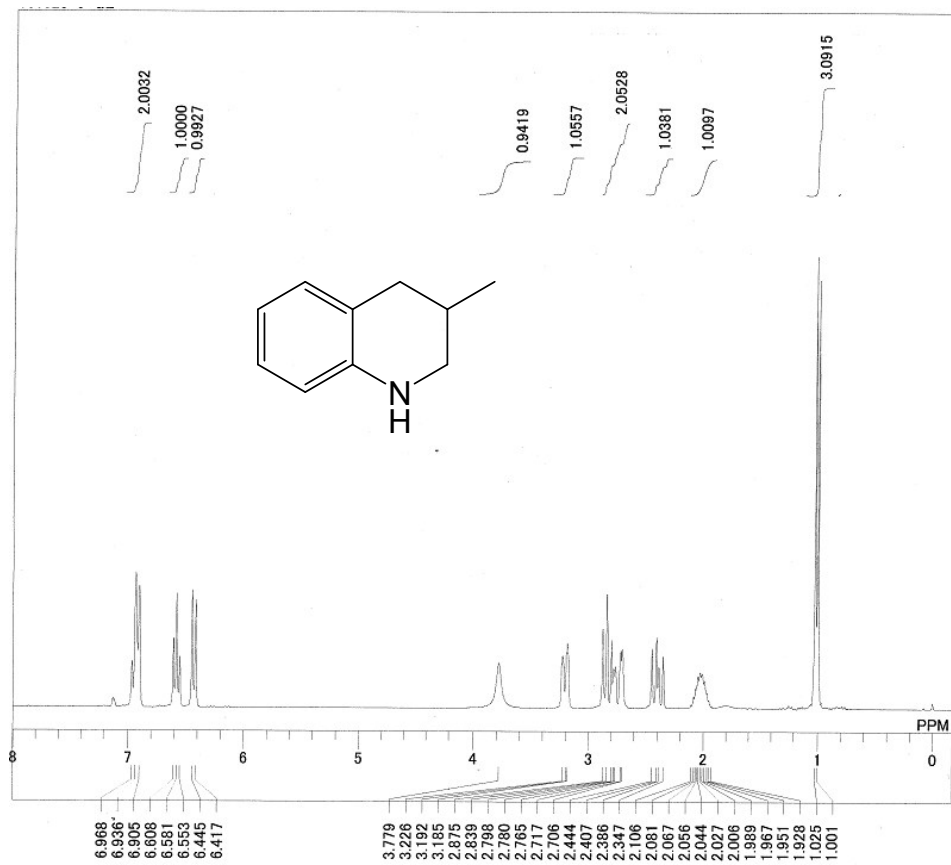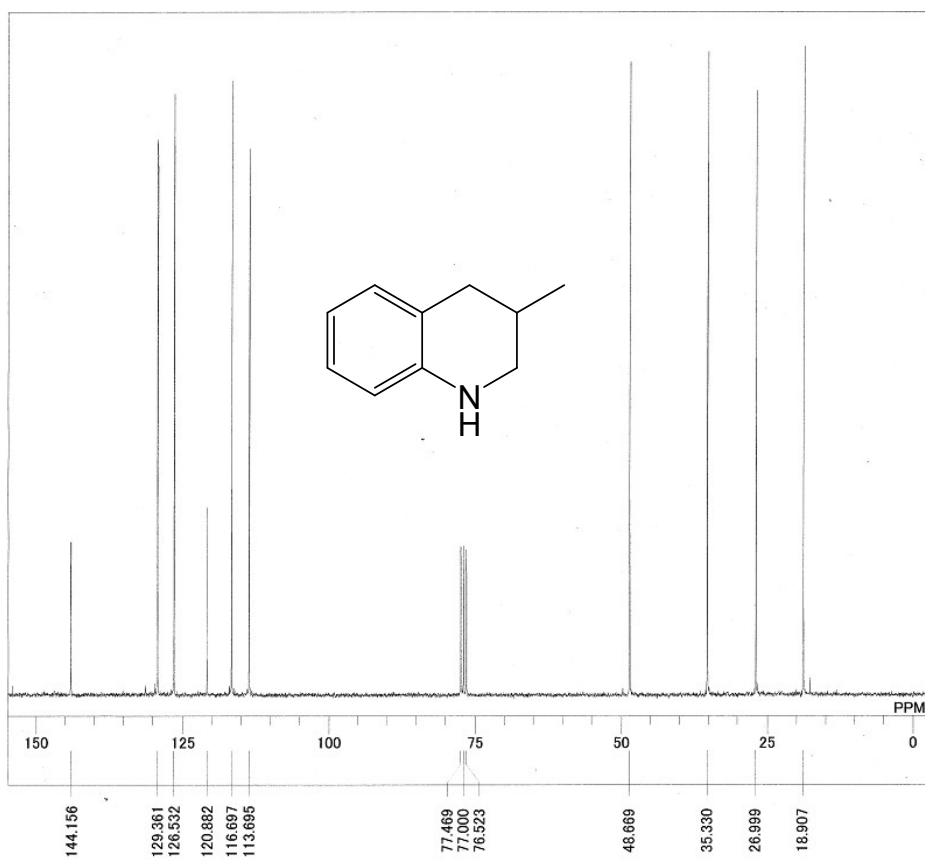

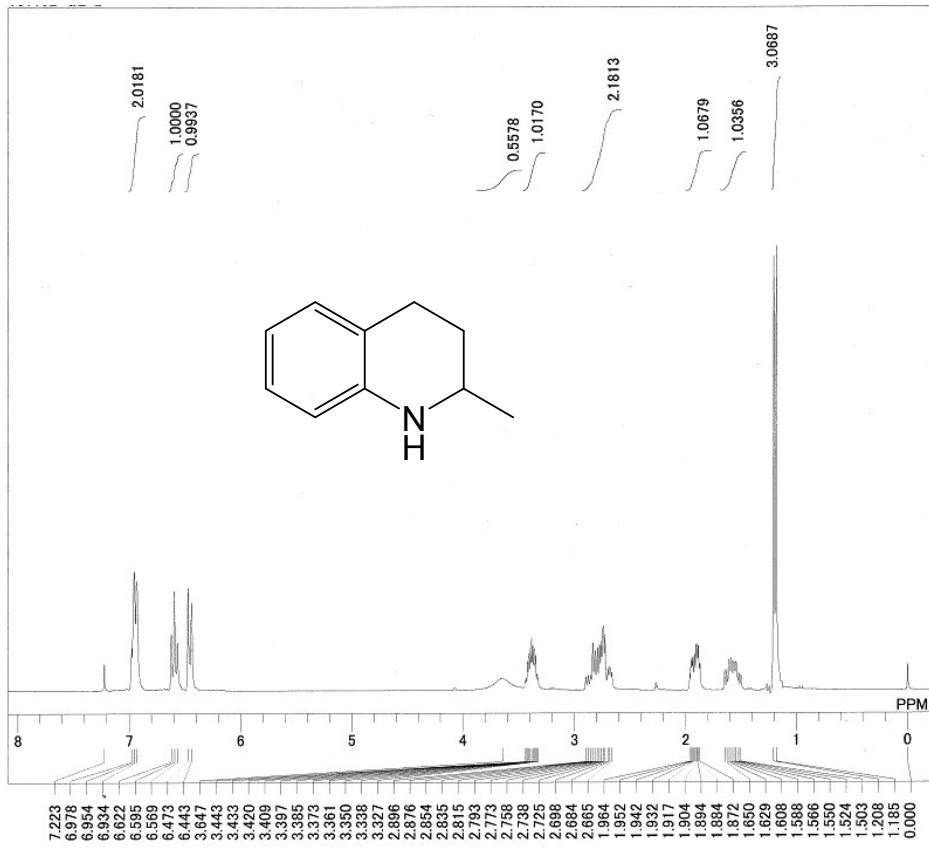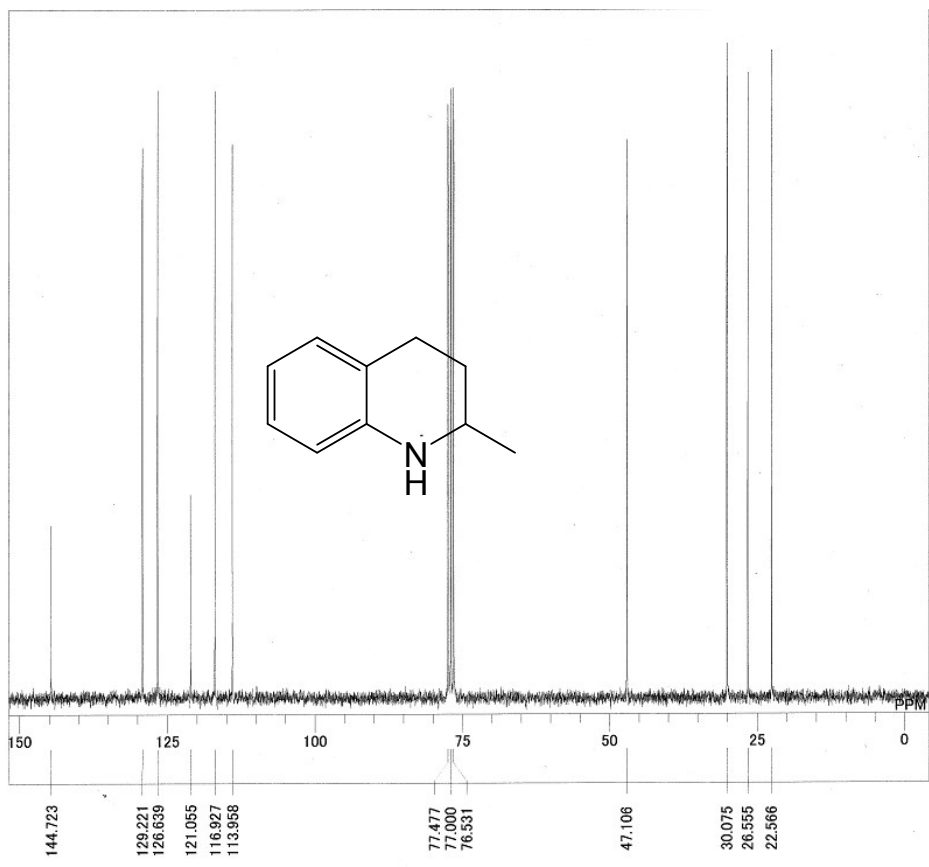



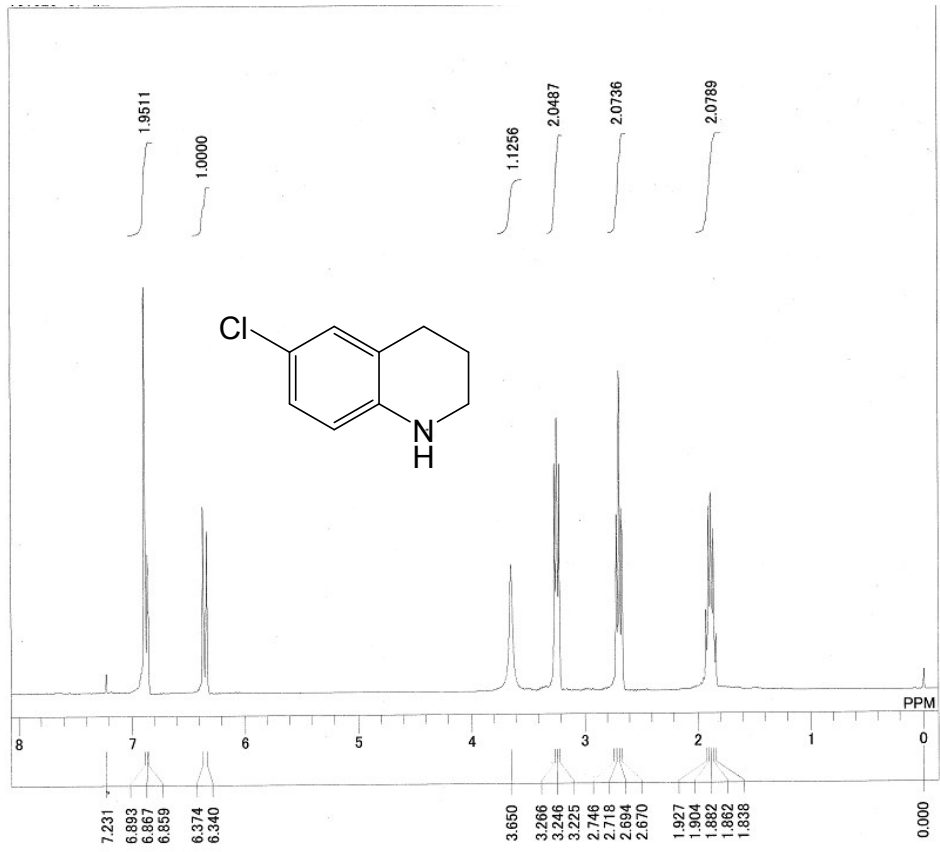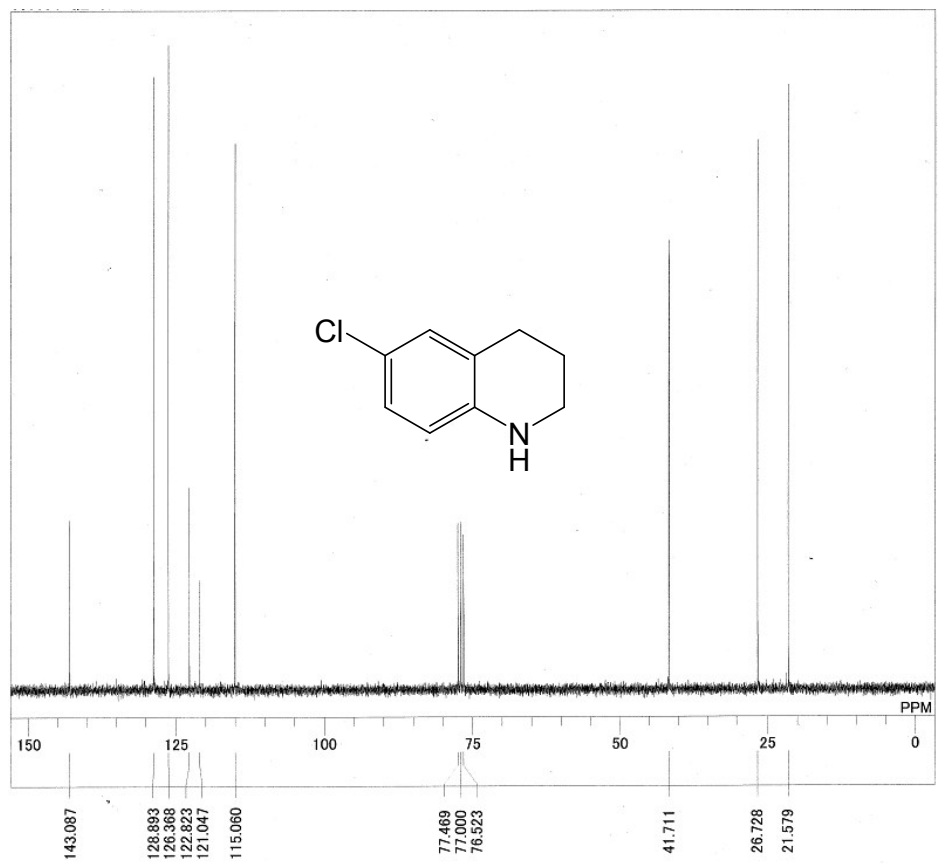

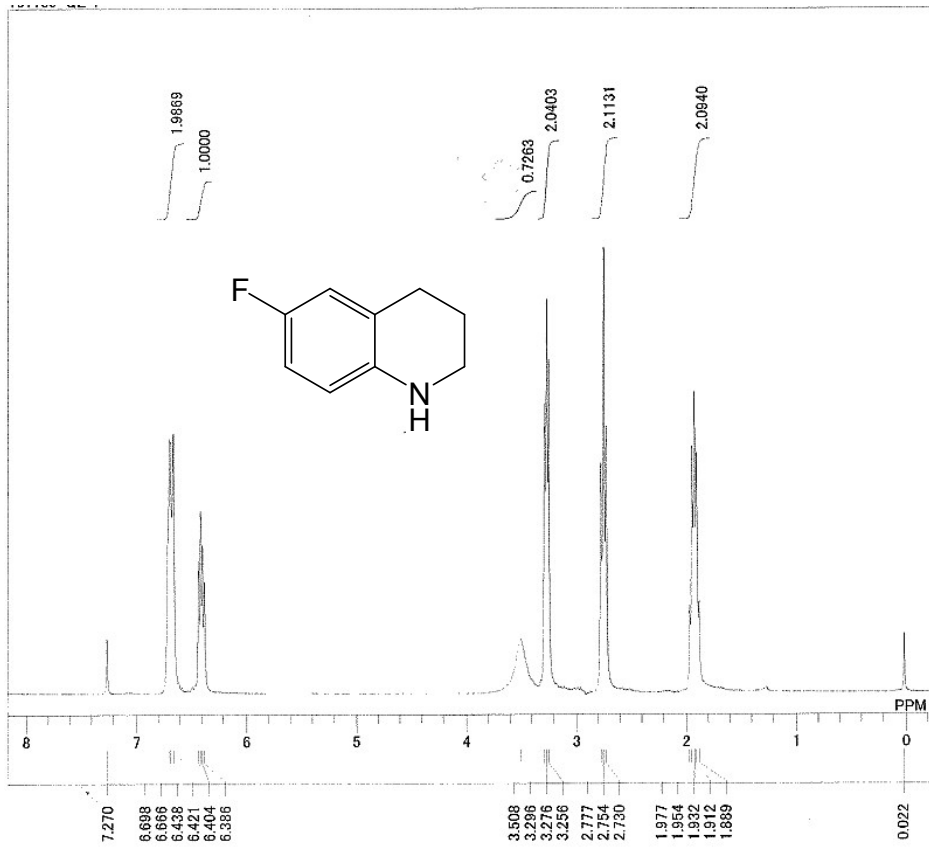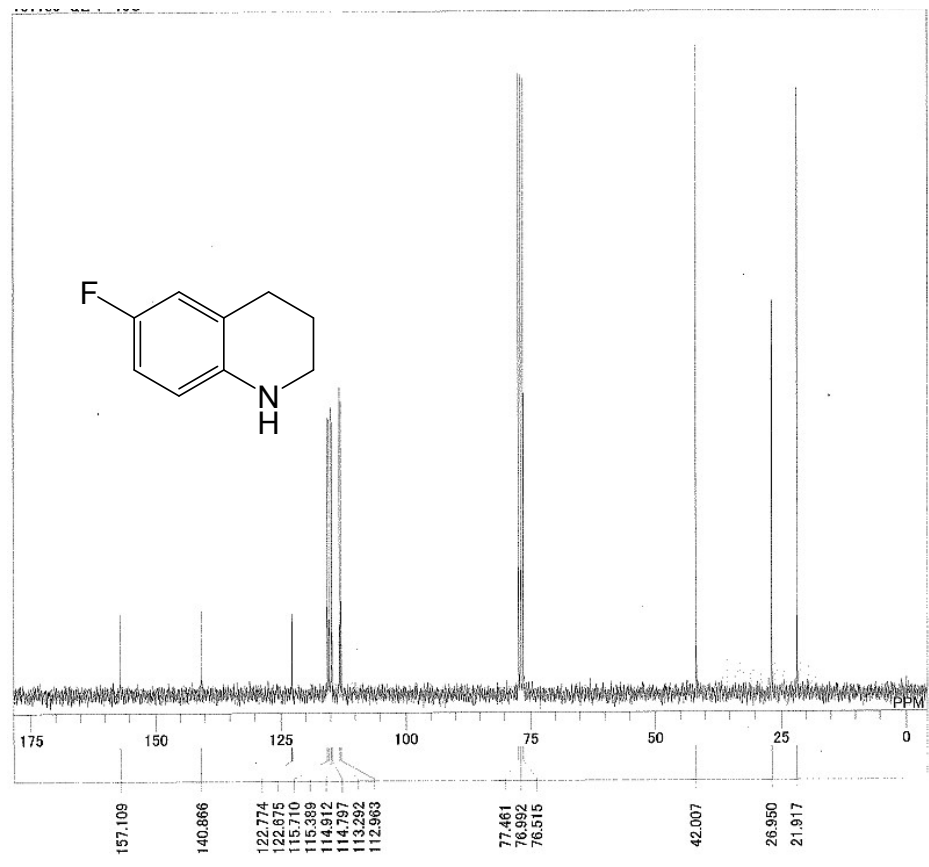

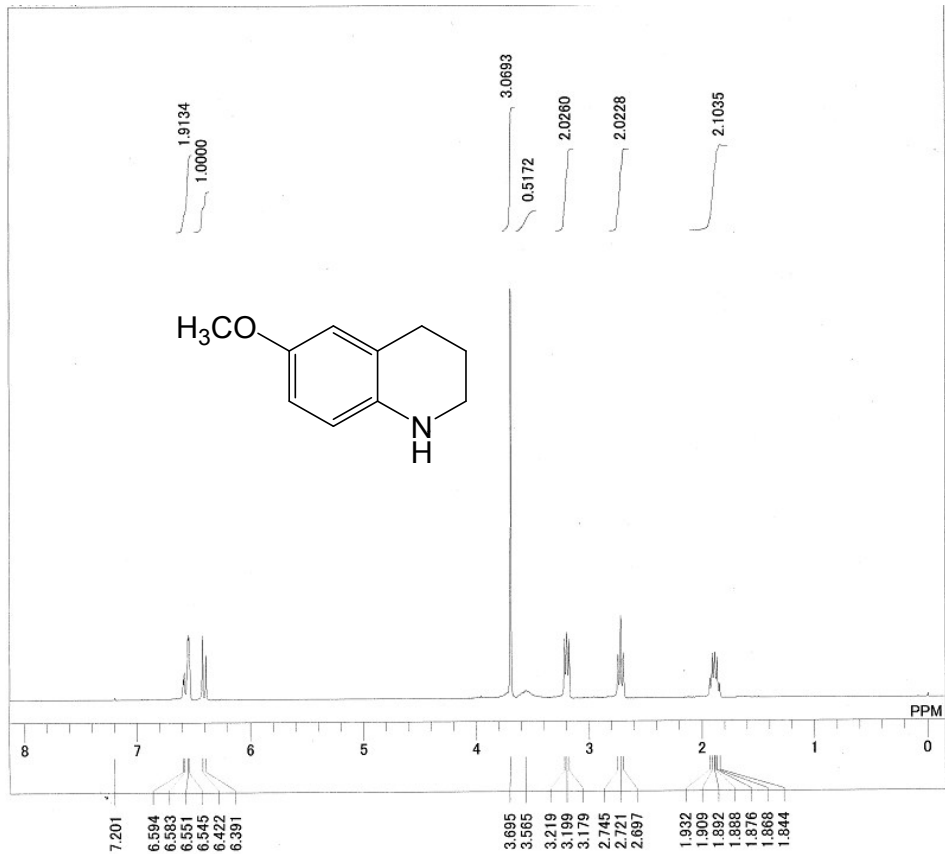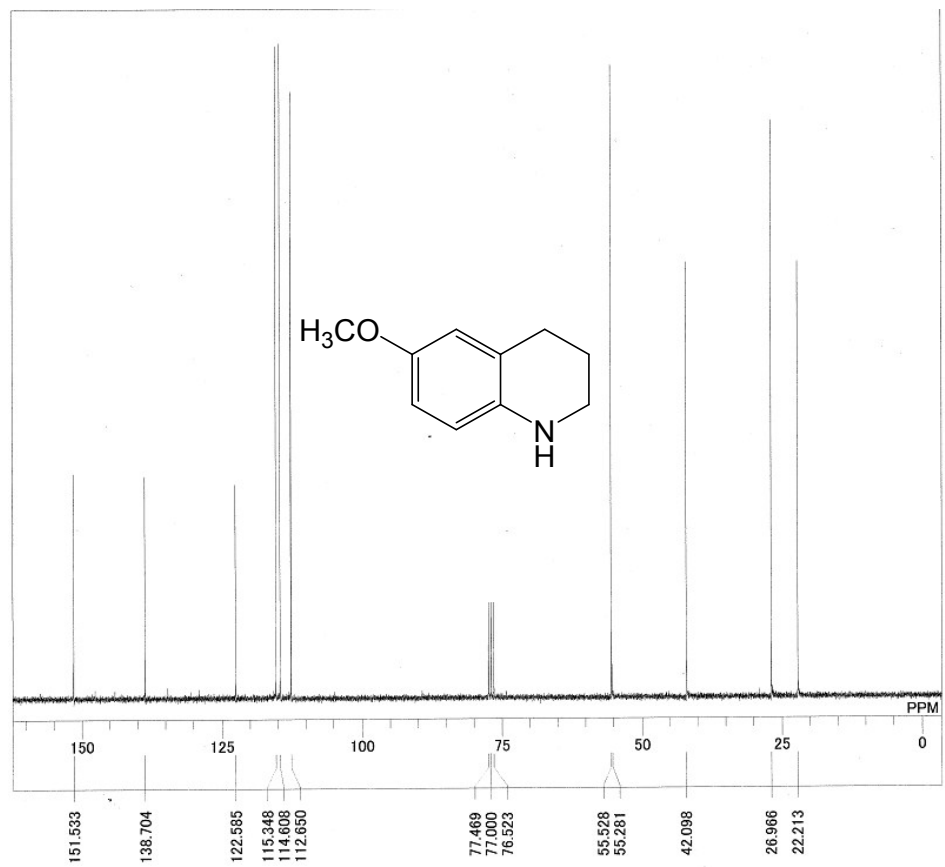

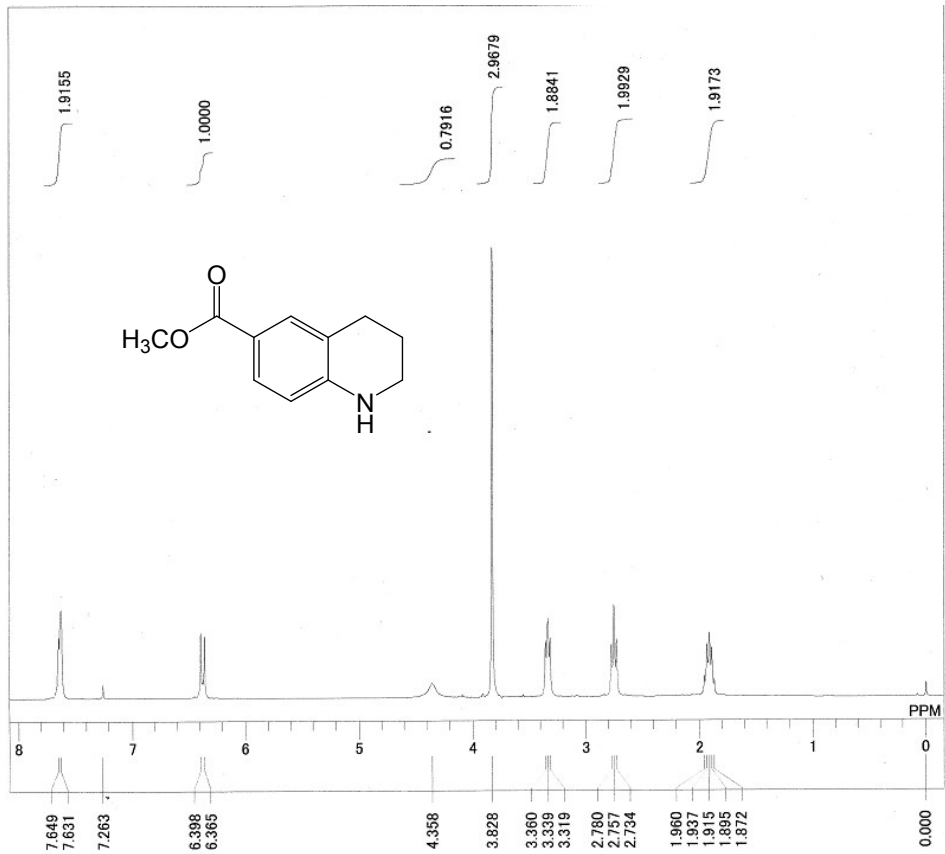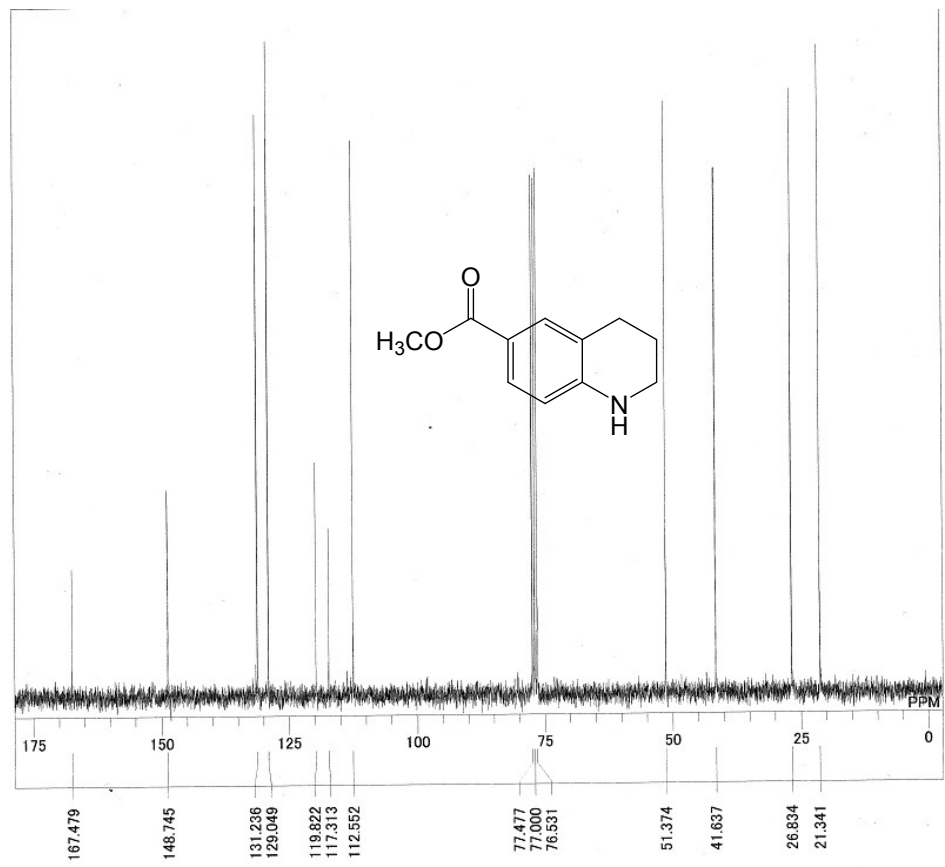

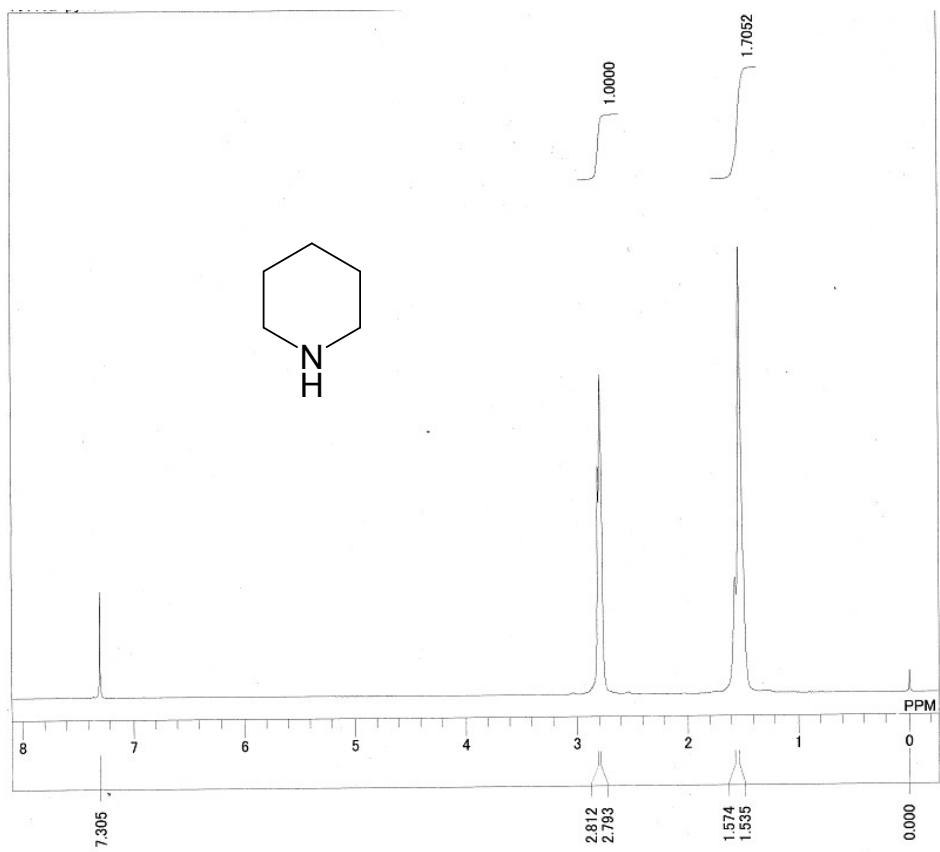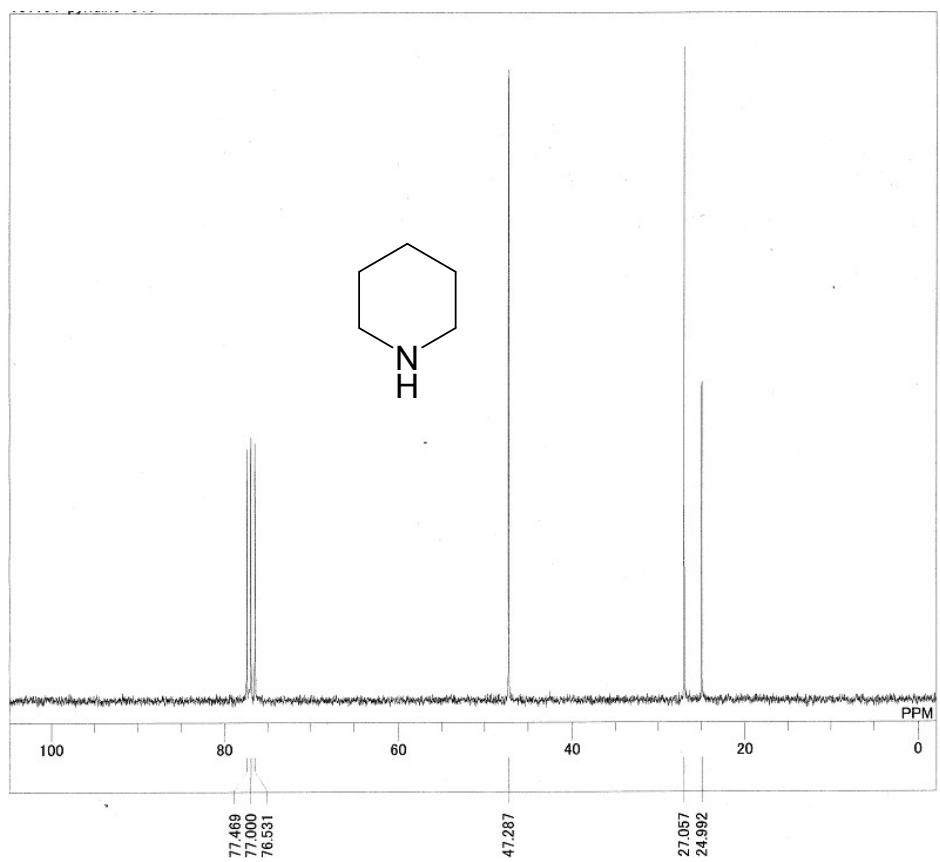

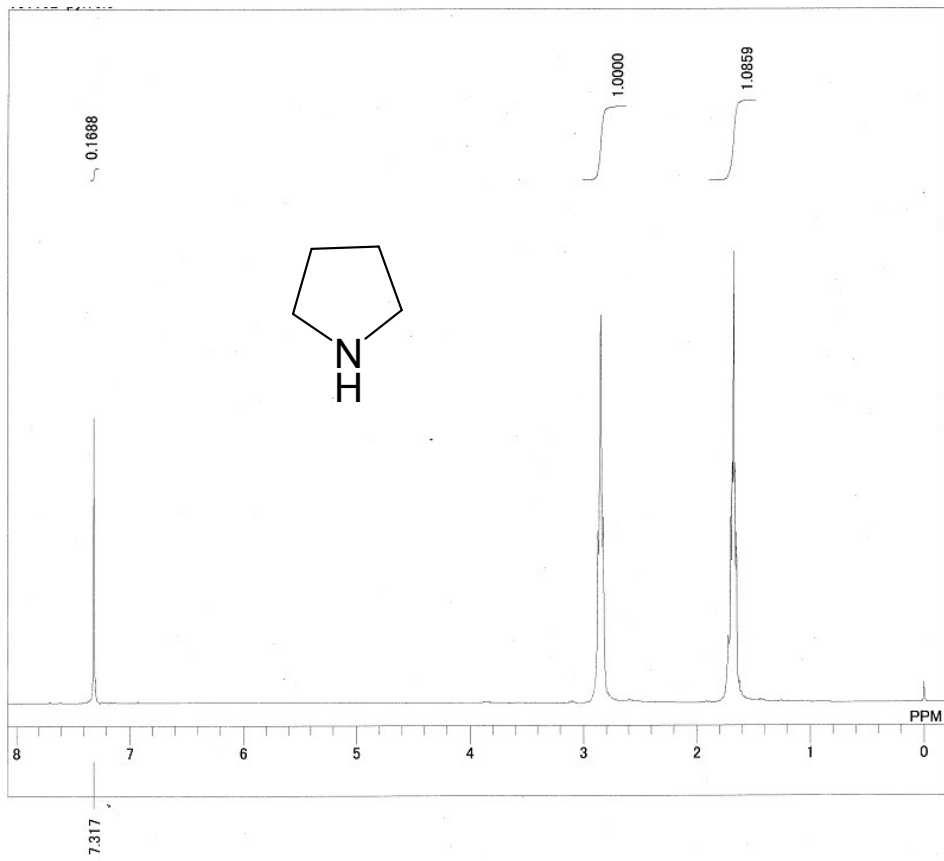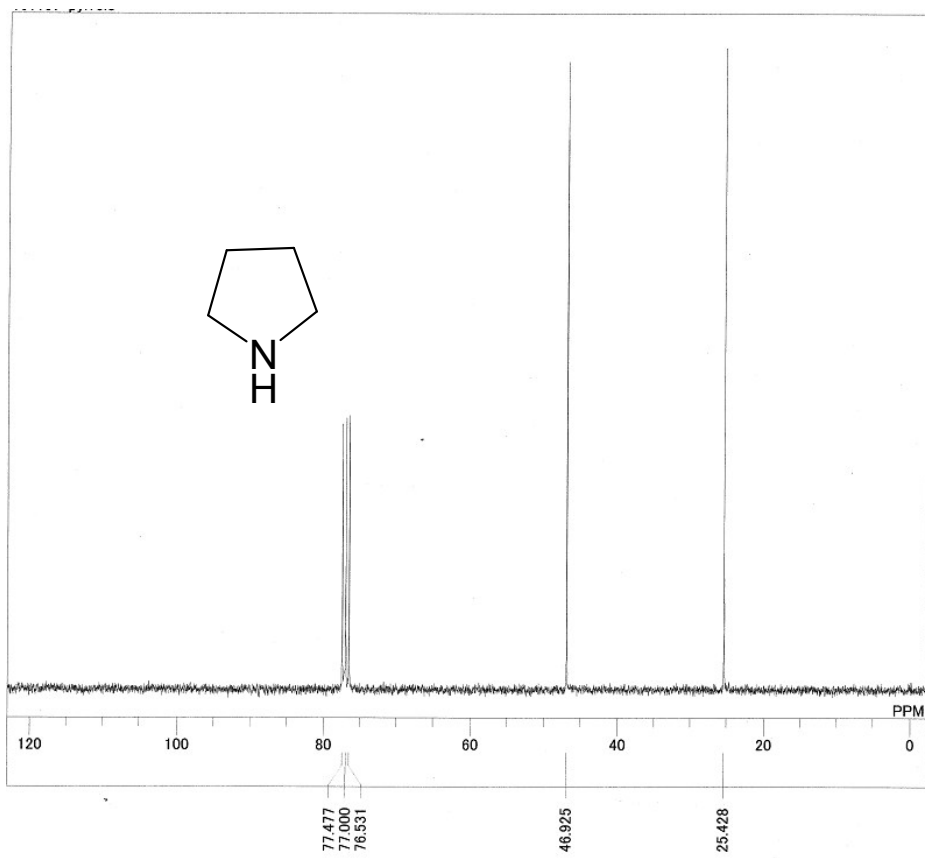

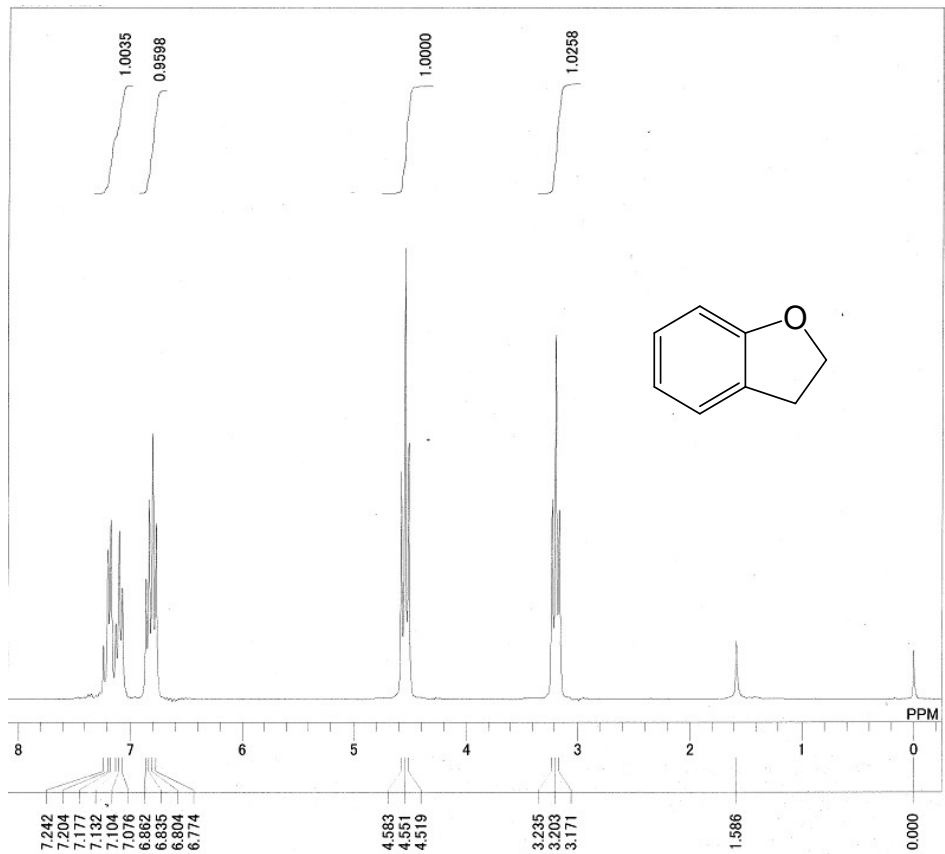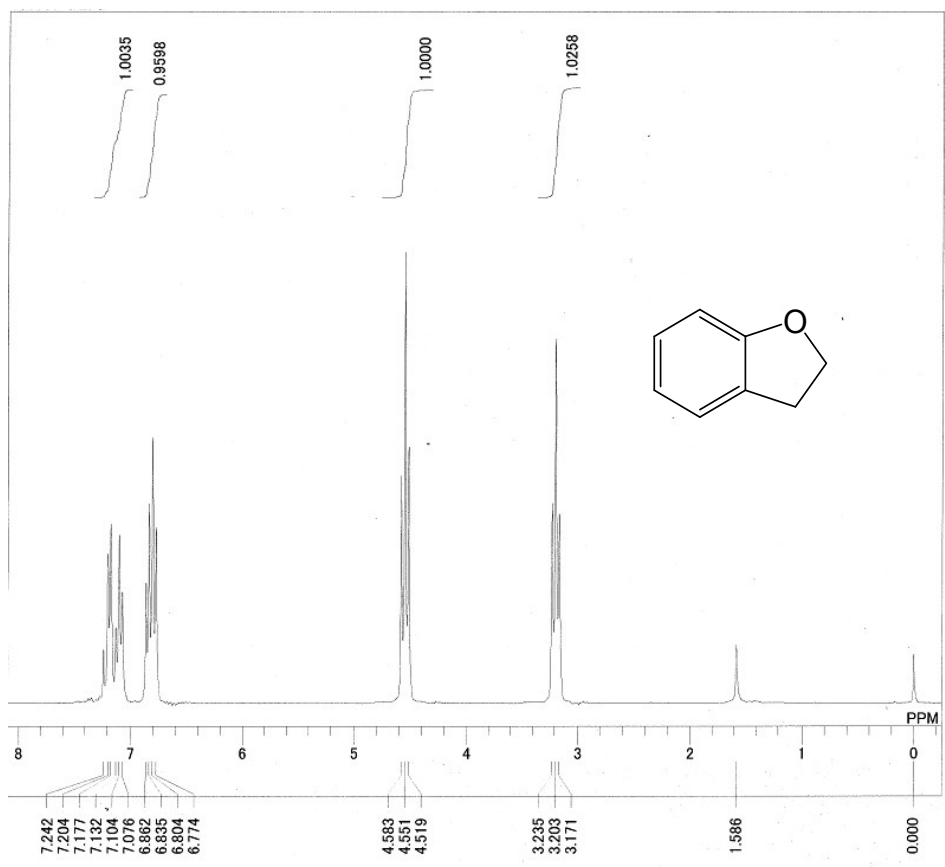

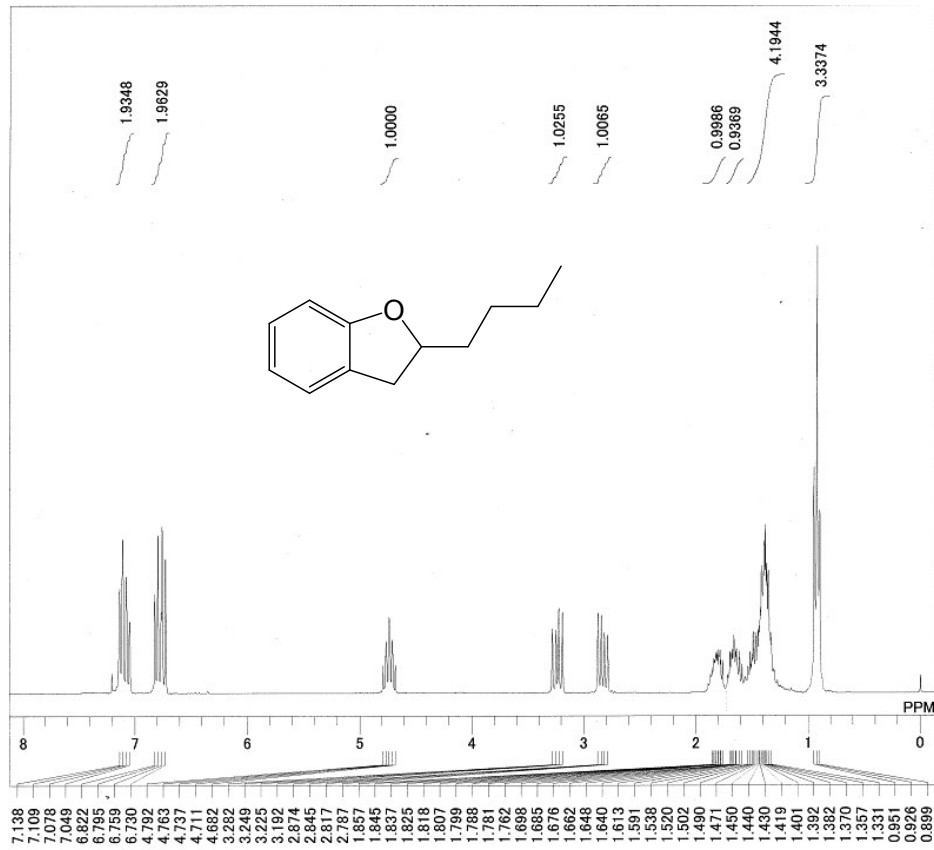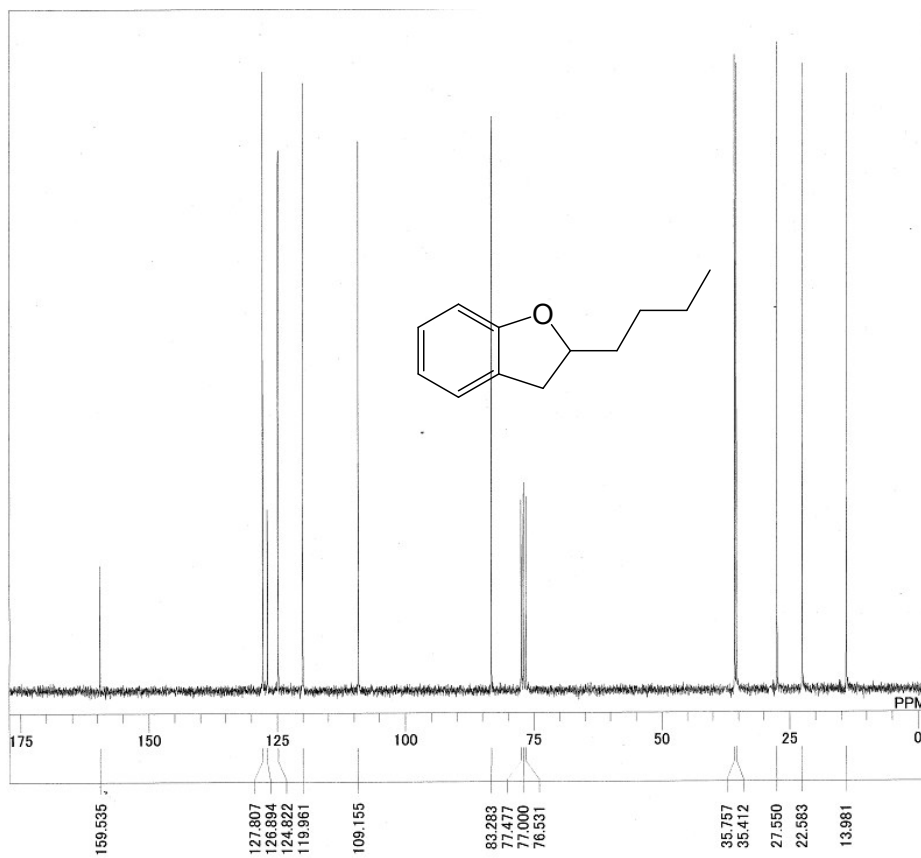



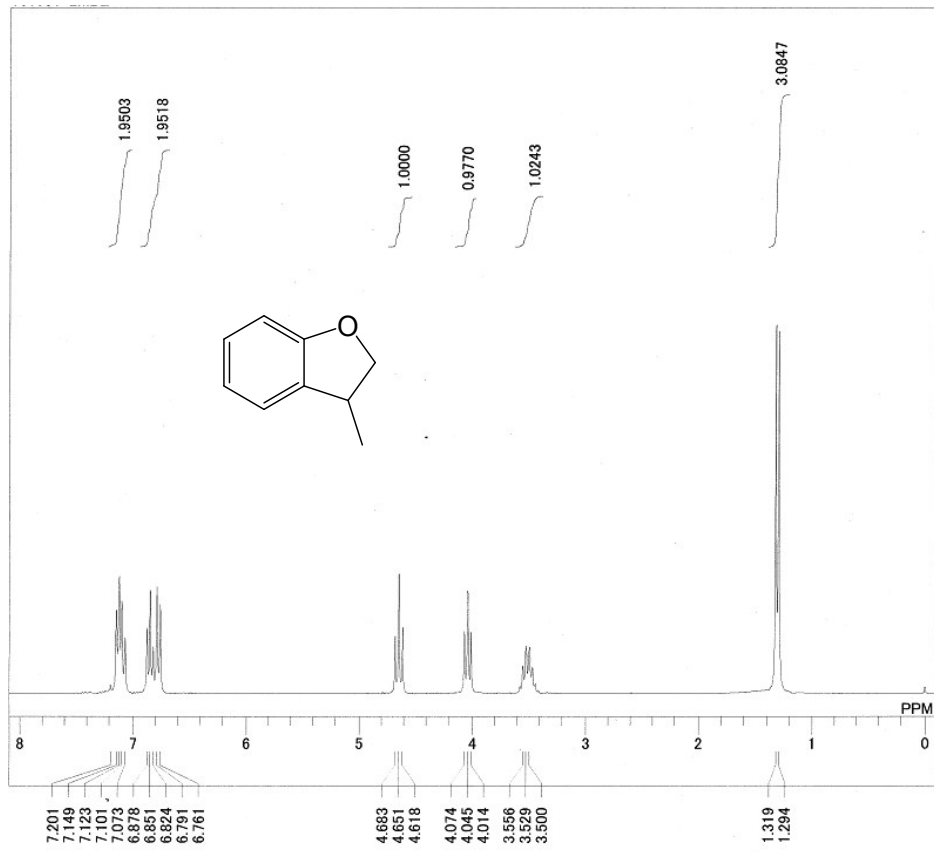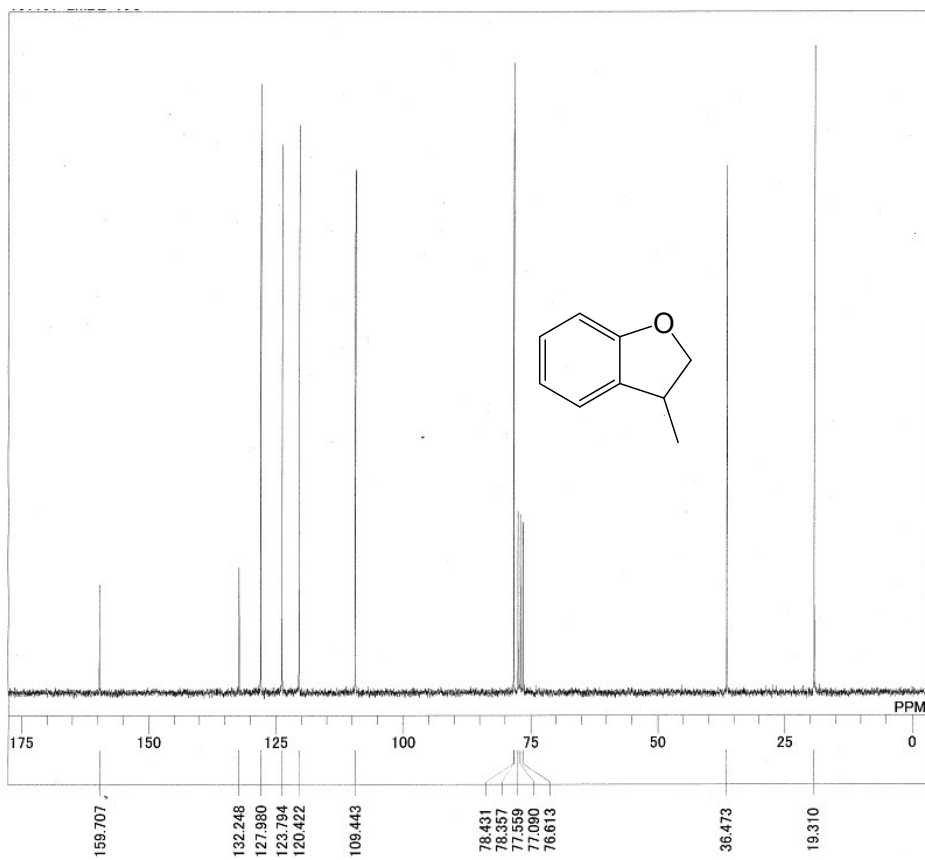

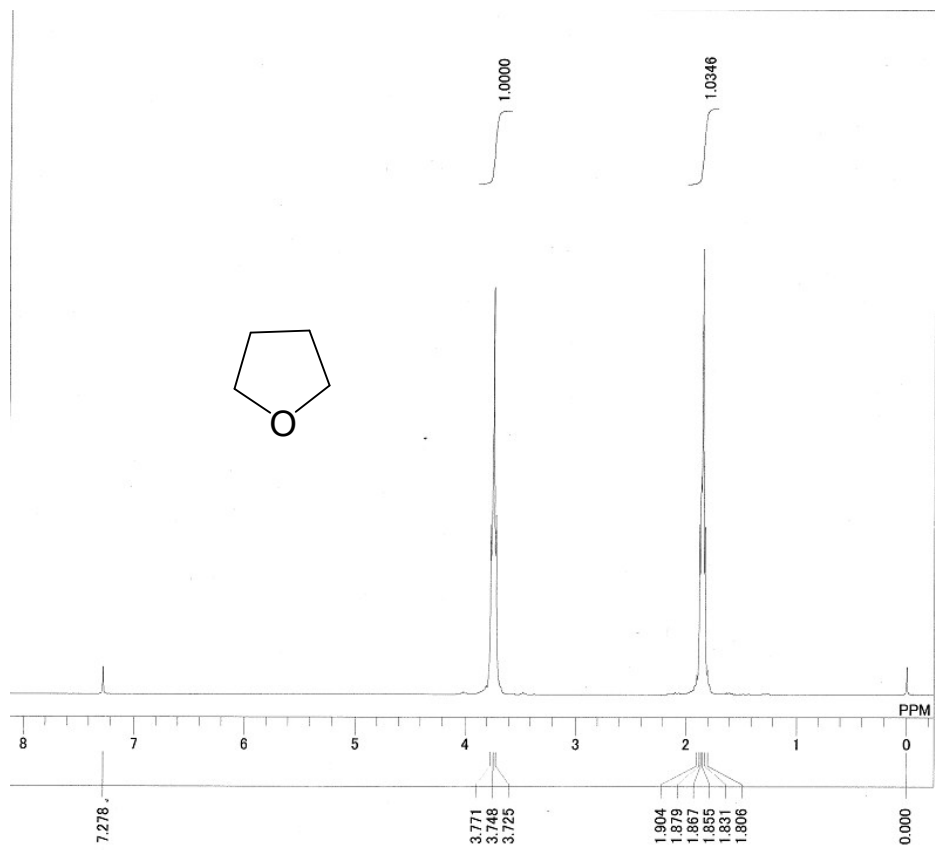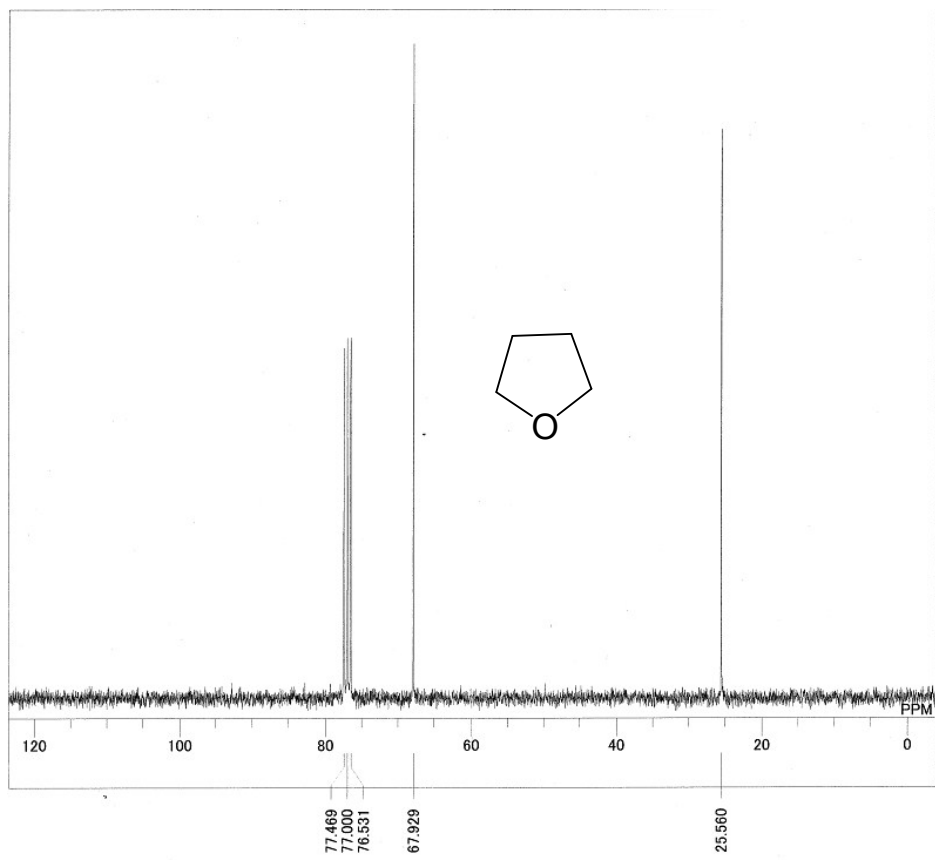

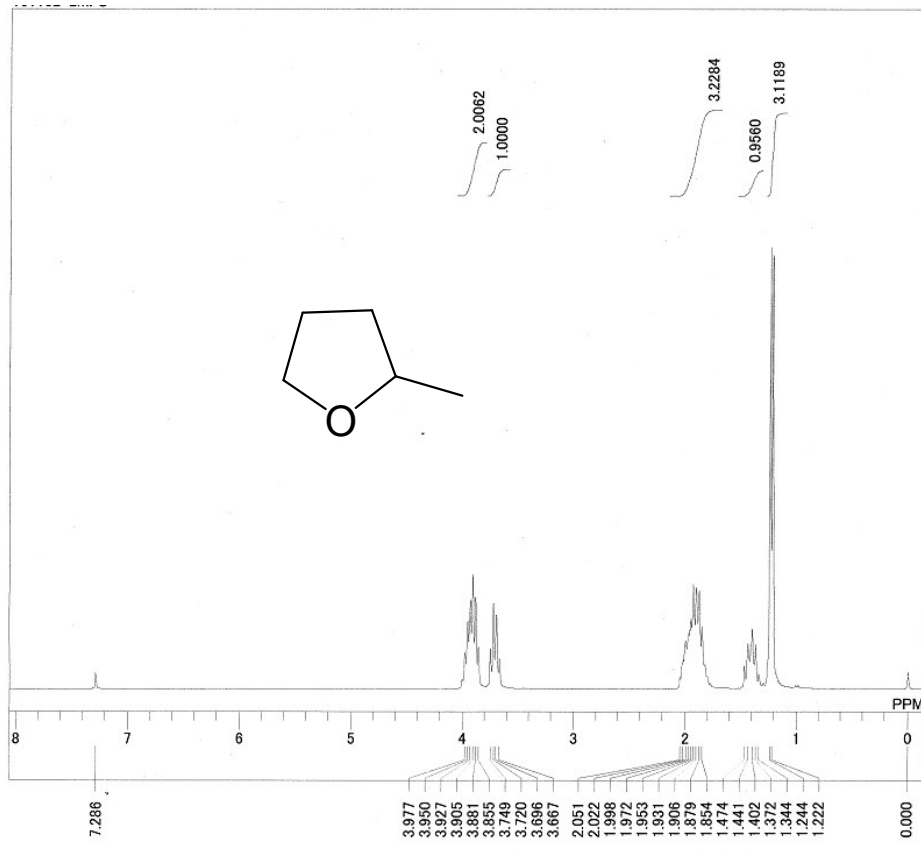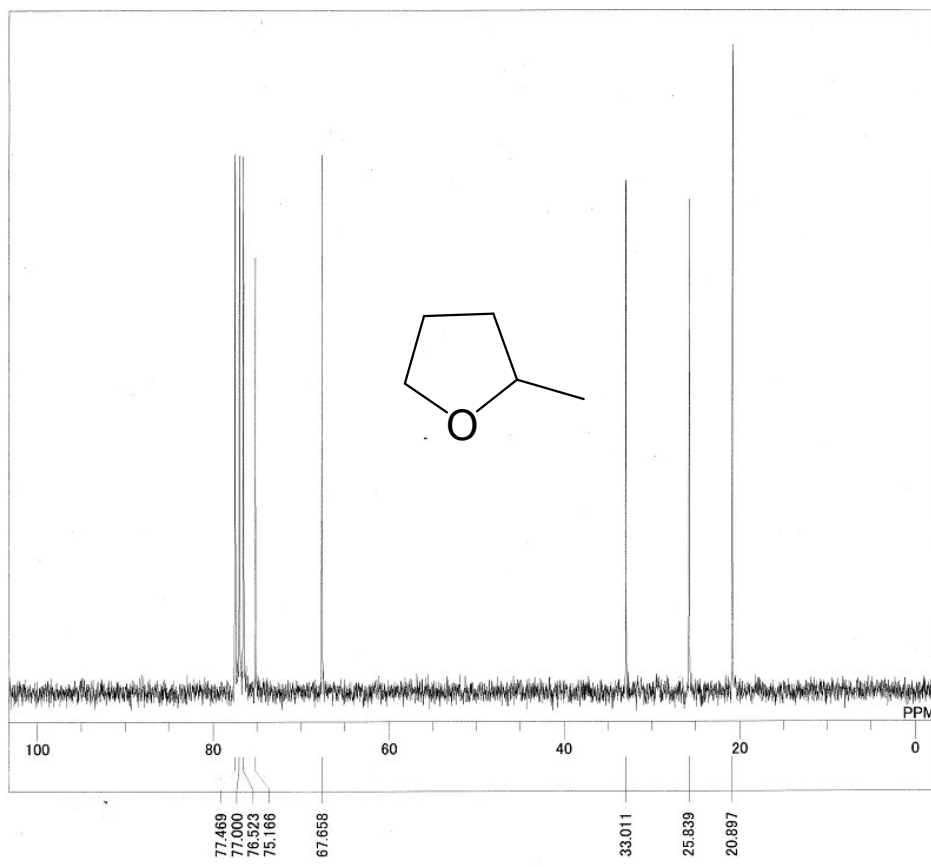

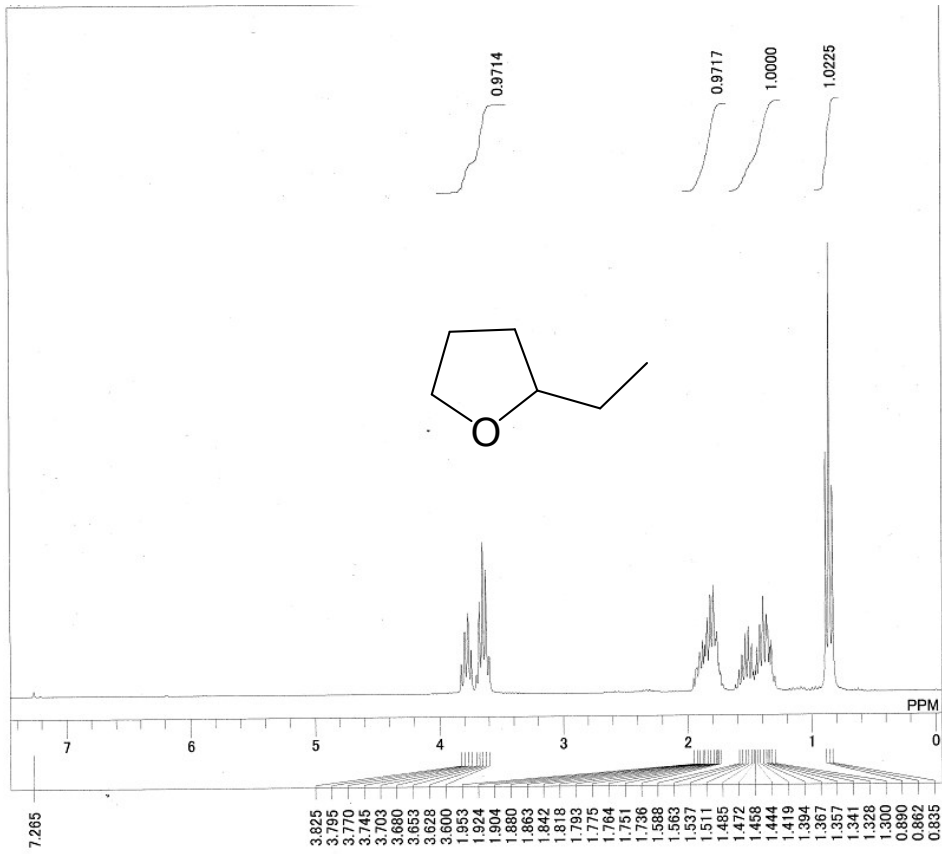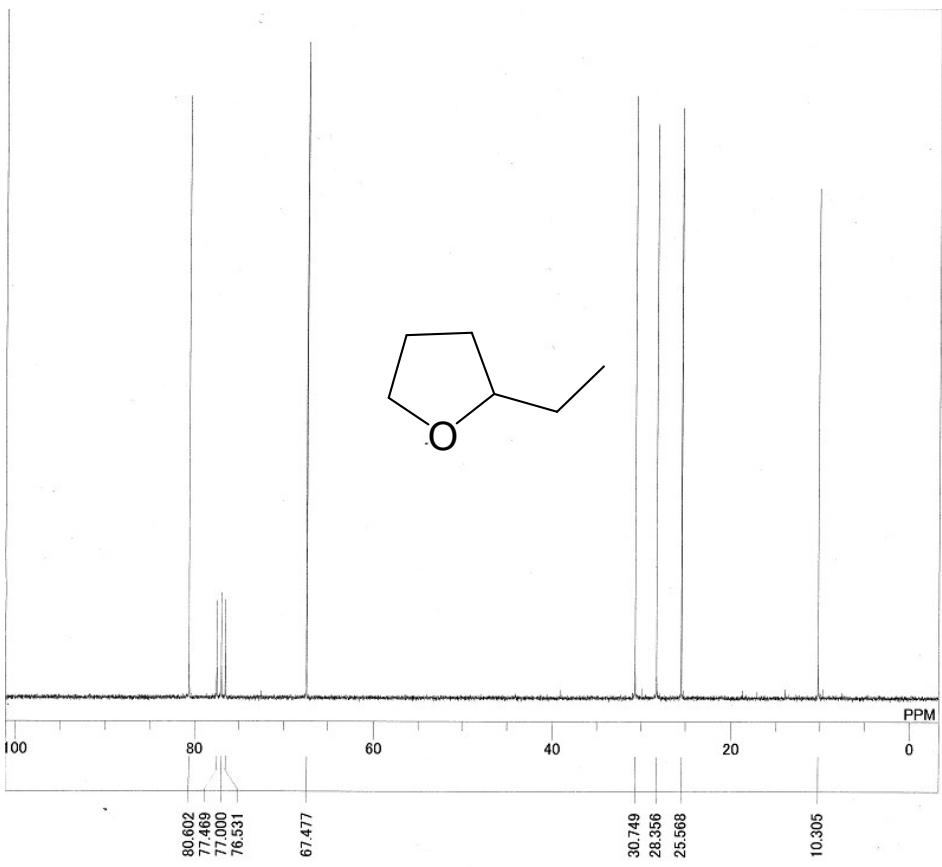

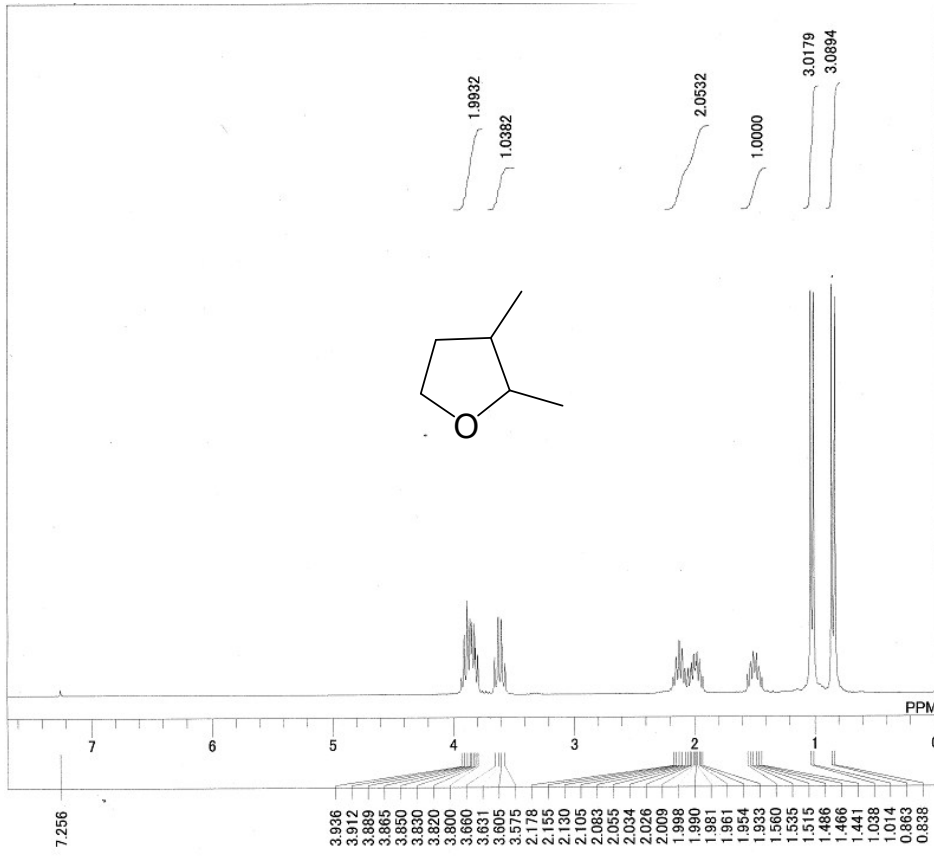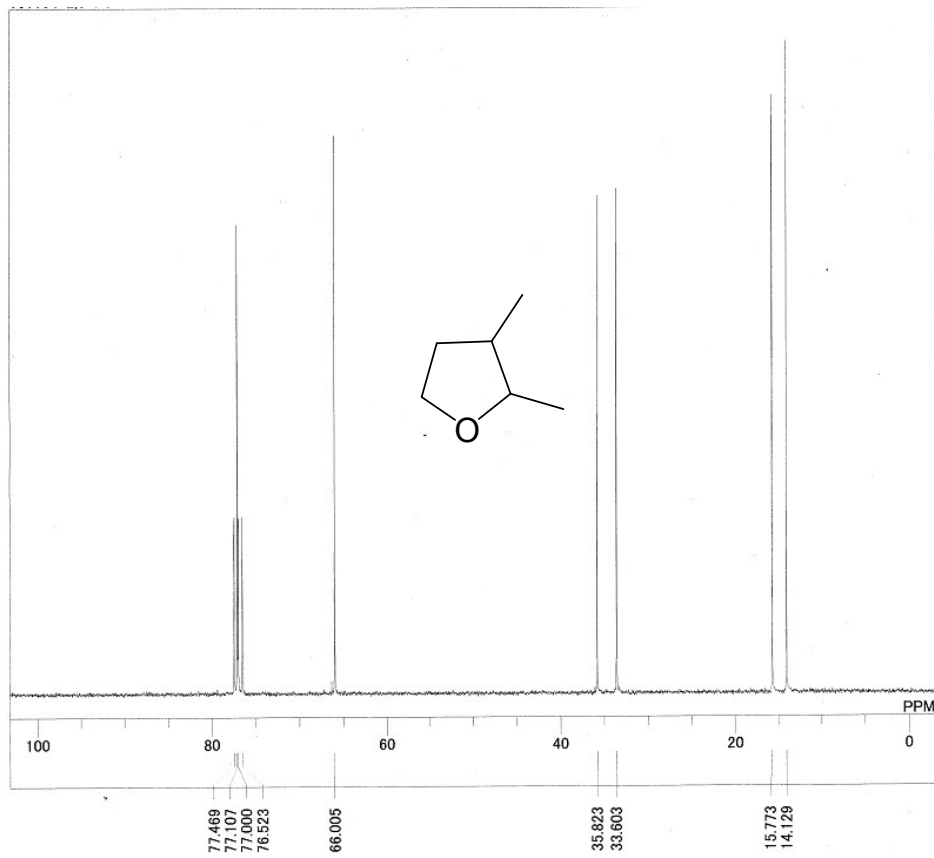

Supplement: c6gc02782b1.pdf [file c6gc02782b1.pdf]
